# Supplementary material for: Association of Language Barriers With Perioperative and Surgical Outcomes: A Systematic Review
Source: PubMed Central journal article supplement (PMC10336626; doi:10.1001/jamanetworkopen.2023.22743), 2023-07-11

## Supplementary Online Content

Joo H, Fernández A, Wick EC, Moreno Lepe GM, Manuel SP. Association of language barriers with perioperative and surgical outcomes: a systematic review. *JAMA Netw Open*. 2023;6(7):e2322743. doi:10.1001/jamanetworkopen.2023.22743

**eAppendix 1.** Methodological Details

**eAppendix 2.** Detailed Search Strategy

**eReferences**

**eTable 1.** Study Outcomes, Methods, and Results by Category

**eTable 2.** Decision for Inclusion and Exclusion

**eTable 3.** Unadjusted Results

**eFigure 1.** Articles per Year That Met Inclusion Criteria

**eFigure 2.** Perioperative Outcomes Represented

This supplementary material has been provided by the authors to give readers additional information about their work.

## eAppendix 1. Methodological Details

This systematic review is reported in accordance with the Preferred Reporting Items for Systematic Reviews and Meta-Analysis Protocols (PRISMA-P) guidelines.<sup>1</sup> We sought to answer the question: “Is limited English proficiency in adult patients associated with differences in perioperative care and surgical outcomes, as compared to English proficient patients?” We specified the research question and prospectively registered our research protocol with PROSPERO (CRD42022299569) prior to the initiation of the search.<sup>2</sup>

### Search Strategy

A search strategy was developed in conjunction with a research librarian (Josephine Tan, MLIS) and consisted of Medical Subject Headings (MeSH) terms related to language barriers, perioperative or surgical care, and perioperative outcomes as listed in Appendix 1. We performed searches in MEDLINE via PubMed, EMBASE, Web of Science, Sociological Abstracts, and CINAHL with no restriction on publication date. The final search was conducted on December 7, 2022. Citations listed in bibliographies of articles that met eligibility criteria, including any relevant systematic reviews and meta-analyses, were also reviewed. We also consulted experts in the field of language barrier research for additional article suggestions. Only studies in English and conducted in English speaking countries were included.

### Study Selection Criteria

Inclusion criteria included original observational or experimental studies (cohort, case-control, cross-sectional, and randomized clinical trials) comparing perioperative care and surgical outcomes between adult (18+ years) patients with and without limited English proficiency. Studies must have an identified control group that is English proficient and findings based on primary or secondary data analysis. Studies were conducted in English speaking countries, and published in an English-language, peer-reviewed journal.

Exclusion criteria included: studies with only qualitative data, case reports, perspective pieces, editorials, information in books, letters, dissertations, lectures, conference abstracts, incomplete articles; studies that define communication barriers as other than linguistic barriers (e.g., cognitive deficit, speech-language pathology, physical handicap); studies that do not consider outcomes following a surgical or anesthetic intervention (e.g., primary care services, preventative care); studies without a comparison group of English proficient patients; studies did not specify limited English proficiency status as a primary/secondary predictor or a part of prediction sets *a priori*; studies not conducted in English speaking countries; studies in pediatric populations (i.e. included participants <18 years of age); non-human research; and studies with outcomes in obstetrics or labor and delivery.

### Study outcomes

We examined outcomes across the perioperative period (including the preoperative, intraoperative, and postoperative phases of a surgical admission). Reported outcomes included access to surgical procedures, delays in receiving surgical care, perioperative pain management, length of stay, discharge disposition, postoperative complications, functional recovery, mortality, and hospital readmissions (Table 1, eTable 1). There were no included studies that reported outcomes related to anesthetic or surgical technique. We sought outcome data pertaining to each perioperative domain regardless of time points and analytic methods used.

### Data Extraction

Search results were organized and duplicates removed using the reference manager, Zotero (<https://www.zotero.org>). Reference files were then imported into a systematic review organization software, Rayyan (<http://rayyan.qcri.org>). Initial title and abstract screening was completed by two researchers (S.M and G.M.) independently. Eligibility disagreements were resolved by consensus. Manuscripts deemed potentially eligible for inclusion then underwent full text screening by two independent reviewers (S.M. and H.J.). Any disagreements over inclusion were resolved by consensus and in consultation with a third researcher (A.F.). All reasons for exclusion during the full text screen were recorded based on the inclusion and exclusion document (Supplementary Table 1).

Two independent investigators (S.M. and H.J.) extracted data from the selected studies. The investigators re-reviewed each study when required to meet consensus on discordance. The following data were extracted from all included studies using a standardized extraction form: publication information/year, study location, study design/methodology, study population, setting, type of anesthetic/surgical intervention, how limited English

proficiency was defined, whether studies further sub-categorized limited English proficiency, whether studies included race and/or ethnicity, comparator group, covariates used to control for socioeconomic status, other covariates, outcomes of interest, the magnitude and direction of associations between LEP and the outcome measures including but not limited to odds ratio, hazard ratio, means ratio, incidence rate ratio, relative risk, and absolute mean difference with 95% confidence intervals. If additional confirmation of data was necessary, we searched for supplementary documents and reports from the same study. Data extraction results were processed and documented in Microsoft Excel (<https://office.microsoft.com/excel>) tables. The studies were grouped by outcome measures studied.

### **Risk of Bias Assessment**

The Newcastle-Ottawa Scale (NOS) for cohort studies was selected for bias assessment because all included studies in this review utilized a non-randomized observational design.<sup>3</sup> The NOS is a validated tool with established inter-rater reliability that uses a rating system for study group selection, cohort comparability, and assessment of the exposure or outcome of interest. The maximum rating is 9 stars, with higher-quality studies receiving more stars. Two authors (S.M. and H.J.) independently assessed the risk of bias of each included study with differences resolved by consensus.

### **Data Synthesis**

Due to lack of homogeneity in analysis and outcomes among studies, we were unable to pool data to synthesize in a quantitative analysis. Instead, studies were grouped, analyzed, and presented using a narrative approach. If applicable, measures of association were converted so that they represent the relationship between LEP and outcome domains with EP patients being the reference group. Assessment of certainty of evidence using the GRADE system was not conducted due to inadequate quality and inability to quantitatively synthesize data by outcome category.<sup>4</sup> Alternatively, we organized included studies by outcome of interest to facilitate data interpretation (Figure 2).

### **Limitations**

This systematic review design has several limitations. Only peer-reviewed published original research is included, so the findings reported could be subject to publication bias as any relevant unpublished studies would not be included. Due to the heterogeneity of included studies with regards to study setting, surgical subspecialty, outcome measurement, statistical methodology, and measure of association, we were unable to pool data to perform a meta-analysis or otherwise directly compare findings to each other. For example, though multiple studies evaluated length of stay (LOS), the definition of LOS varied across studies (sometimes defined from presurgical admission to discharge, and other times only included post-procedure hospitalization time). The variable was processed differently (one study dichotomized LOS by an arbitrary cutoff, others converted LOS to quartiles or logarithm, and others treated LOS as a continuous variable), and measures of association used to describe effect size estimates were widely variable (including means ratio, odds ratio, incidence rate ratio, and absolute difference in mean). We are, none-the-less, able to report directionality of evidence. A wide variation in ascertainment of LEP exposure may have influenced associations that were found in this systematic review. While some studies used only non-English primary or preferred language to define LEP, other studies used additional measures to verify limited ability to communicate in English in the healthcare setting. In line with this variability, a vast majority of included studies did not provide information regarding how hospitals or health systems managed language barriers for LEP patients. It is probable that the observational studies included in this review were unable to control for all potential confounding variables, such as unmeasured differences between the EP and LEP cohorts (i.e., patient-provider language concordance). The way that outcomes of interest were measured in the studies allowed for variations in residual confounding effects, which impeded our ability to assess differences for patients with LEP. Both inapplicability of quantitative synthesis and possibility of residual confounding hinder assessment of certainty of evidence and complicate interpretation of the body of evidence. Where numerous outcomes and comparisons were evaluated, there is a risk that some findings might be statistically significant by chance. This is a particular concern with studies that constructed multivariable prediction models<sup>5-7</sup> or conducted preliminary multiple comparisons prior to establishing final risk score models.<sup>8</sup> Moreover, the quality of evidence ratings provided by NOS are largely subjective and some might disagree with our assessments. Lastly, qualitative studies describing subjective experience of LEP patients were not included *a priori* although some studies suggest there may be a link between language barrier and shared decision making.

## eAppendix 2. Detailed Search Strategy

### Key search term categories:

**language barriers** (eg, “language barriers,” “language proficiency,” “communication barriers,” “English proficiency,” “non-English,” “limited English proficiency,” “linguistic disparity”);

**Perioperative or surgical care** (eg, “preoperative,” “intraoperative,” “postoperative,” “postoperative care,” “perioperative,” “anesthesia,” “anesthesiologist,” “surgeon,” “Surgical Procedure\*,” “operation,” “operating room,” “postanesthesia care unit,” “PACU”)

**Perioperative outcomes** (eg, “Access,” “Disparity,” “Intraoperative Complications,” “Postoperative Complications,” “complications,” “morbidity,” “morbidity,” “Pain,” “Nausea,” “Symptom management,” “Reoperation,” “Survival Rate,” “Mortality,” “Length of Stay,” “Readmission,” “Treatment Outcome,” “Outcome Assessment,” “Outcomes Research,” “Outcome Study,” “Outcome Measures”)

Final search completed December 7, 2022

### PubMed

(“language barriers” OR “language proficiency” OR “communication barriers” OR “communication barriers”[mesh] OR “English proficiency” OR “limited English proficiency” OR “non-English” OR “linguistic disparity”) AND (preoperative OR intraoperative OR postoperative OR “postoperative care”[mesh] OR perioperative OR anesthesia OR anesthesiologist OR surgeon OR “Surgical Procedure” OR surgery OR operation OR “operating room” OR “postanesthesia care unit” OR PACU) AND (morbidity OR morbidity[mesh] OR “length of stay” OR “length of stay”[mesh] OR disparity OR “Intraoperative Complications” OR “Postoperative Complications” OR complications OR Pain OR Nausea OR “Symptom management” OR Reoperation OR “Survival Rate” OR Mortality OR Readmission OR “Treatment Outcome” OR “Outcome Assessment” OR “Outcomes Research” OR “Outcome Study” OR “Outcome Measures”)

Filters applied: Humans, English

### Web of Science

(“language barriers” OR “language proficiency” OR “communication barriers” OR “English proficiency” OR “limited English proficiency” OR “non-English” OR “linguistic disparity”) AND (preoperative OR intraoperative OR postoperative OR “postoperative care” OR perioperative OR anesthesia OR anesthesiologist OR surgeon OR “Surgical Procedure” OR surgery OR operation OR “operating room” OR “postanesthesia care unit” OR PACU) AND (morbidity OR “length of stay” OR disparity OR “Intraoperative Complications” OR “Postoperative Complications” OR complications OR Pain OR Nausea OR “Symptom management” OR Reoperation OR “Survival Rate” OR Mortality OR Readmission OR “Treatment Outcome” OR “Outcome Assessment” OR “Outcomes Research” OR “Outcome Study” OR “Outcome Measures”)

Filters applied

### CINAHL

(“language barriers” OR “language proficiency” OR “communication barriers” OR “English proficiency” OR “limited English proficiency” OR “non-English” OR “linguistic disparity”) AND (preoperative OR intraoperative OR postoperative OR “postoperative care” OR perioperative OR anesthesia OR anesthesiologist OR surgeon OR “Surgical Procedure” OR surgery OR operation OR “operating room” OR “postanesthesia care unit” OR PACU) AND (morbidity OR “length of stay” OR disparity OR “Intraoperative Complications” OR “Postoperative Complications” OR complications OR Pain OR Nausea OR “Symptom management” OR Reoperation OR “Survival Rate” OR Mortality OR Readmission OR “Treatment Outcome” OR “Outcome Assessment” OR “Outcomes Research” OR “Outcome Study” OR “Outcome Measures”)

Filters applied: English language

### Sociological Abstracts

(“language barriers” OR “language proficiency” OR “communication barriers” OR “English proficiency” OR “limited English proficiency” OR “non-English” OR “linguistic disparity”) AND (preoperative OR intraoperative OR postoperative OR “postoperative care” OR perioperative OR anesthesia OR anesthesiologist OR surgeon OR

“Surgical Procedure” OR surgery OR operation OR “operating room” OR “postanesthesia care unit” OR PACU) AND (morbidity OR “length of stay” OR disparity OR “Intraoperative Complications” OR “Postoperative Complications” OR complications OR Pain OR Nausea OR “Symptom management” OR Reoperation OR “Survival Rate” OR Mortality OR Readmission OR “Treatment Outcome” OR “Outcome Assessment” OR “Outcomes Research” OR “Outcome Study” OR “Outcome Measures”)

Filters applied: Peer-reviewed, English language

### **EMBASE**

('language barriers' OR 'language proficiency'/exp/mj OR 'communication barriers'/exp/mj OR 'english proficiency'/exp/mj OR 'limited english proficiency'/exp/mj OR 'non-english' OR 'linguistic disparity') AND ('preoperative' OR 'intraoperative' OR 'postoperative' OR 'postoperative care'/exp/mj OR 'perioperative' OR 'anesthesia'/exp/mj OR 'anesthesiologist'/exp/mj OR 'surgeon'/exp/mj OR 'surgical procedure'/exp/mj OR 'surgery'/exp/mj OR 'operation'/exp/mj OR 'operating room'/exp/mj OR 'postanesthesia care unit'/exp/mj OR 'pacu') AND ('morbidity'/exp/mj OR 'length of stay'/exp/mj OR 'disparity'/exp/mj OR 'intraoperative complications'/exp/mj OR 'postoperative complications'/exp/mj OR 'complications'/exp/mj OR 'pain'/exp/mj OR 'nausea'/exp/mj OR 'symptom management'/exp/mj OR 'reoperation'/exp/mj OR 'survival rate'/exp/mj OR 'mortality'/exp/mj OR 'readmission'/exp/mj OR 'treatment outcome'/exp/mj OR 'outcome assessment'/exp/mj OR 'outcomes research'/exp/mj OR 'outcome study' OR 'outcome measures') AND [English]/lim

Filters applied: Humans, English language

## eReferences

1. Page MJ, Moher D, Bossuyt PM, et al. PRISMA 2020 explanation and elaboration: updated guidance and exemplars for reporting systematic reviews. *BMJ*. 2021;372:n160. doi:10.1136/bmj.n160
2. Manuel SP, Fernández A, Bucklin A, Moreno Lepe G, Wick E. The Impact of Language Barriers on Perioperative Care and Surgical Outcomes: A Systematic Review Proposal. Accessed February 1, 2023. [https://www.crd.york.ac.uk/prospero/display\\_record.php?ID=CRD42022299569](https://www.crd.york.ac.uk/prospero/display_record.php?ID=CRD42022299569)
3. Wells GA, Shea B, O'Connell D, Peterson J, Welch V, Losos M, Tugwell P. The Newcastle-Ottawa Scale (NOS) for Assessing the Quality of Nonrandomised Studies in Meta-Analyses. Accessed February 1, 2023. [https://www.ohri.ca/programs/clinical\\_epidemiology/oxford.asp](https://www.ohri.ca/programs/clinical_epidemiology/oxford.asp)
4. Holger J Schünemann, Julian PT Higgins, Gunn E Vist, Paul Glasziou, Elie A Akl, Nicole Skoetz, Gordon H Guyatt; on behalf of the Cochrane GRADEing Methods Group (formerly Applicability and Recommendations Methods Group) and the Cochrane Statistical Methods Group. Completing 'Summary of findings' tables and grading the certainty of the evidence. In: *Cochrane Handbook for Systematic Reviews of Interventions Version 6.3*. Accessed February 3, 2023. <https://training.cochrane.org/handbook/current/chapter-14>
5. MacDonald V, Ottem P, Wasdell M, Spiwak R. Predictors of prolonged hospital stays following hip and knee arthroplasty. *International Journal of Orthopaedic & Trauma Nursing*. 2010;14(4):198-205. doi:10.1016/j.ijotn.2010.06.001
6. Wilbur MB, Mannschreck DB, Angarita AM, et al. Unplanned 30-day hospital readmission as a quality measure in gynecologic oncology. *Gynecol Oncol*. 2016;143(3):604-610. doi:10.1016/j.ygyno.2016.09.020
7. Aggarwal A, Naylor JM, Adie S, Liu VK, Harris IA. Preoperative Factors and Patient-Reported Outcomes After Total Hip Arthroplasty: Multivariable Prediction Modeling. *J Arthroplasty*. 2022;37(4):714-720.e4. doi:10.1016/j.arth.2021.12.036
8. Silverstein RG, McClurg AB, Moore KJ, Fliss MD, Louie M. Patient Characteristics Associated with Access to Minimally Invasive Gynecologic Surgery: Changes during the COVID-19 Pandemic. *J Minim Invasive Gynecol*. 2022;29(9):1110-1118. doi:10.1016/j.jmig.2022.06.016
9. Sridhar P, Misir P, Kwak H, et al. Impact of Race, Insurance Status, and Primary Language on Presentation, Treatment, and Outcomes of Patients with Pancreatic Adenocarcinoma at a Safety-Net Hospital. *Journal of the American College of Surgeons*. 2019;229(4):389-396. doi:10.1016/j.jamcollsurg.2019.05.027
10. Asokan S, Sridhar P, Qureshi MM, et al. Presentation, Treatment, and Outcomes of Vulnerable Populations With Esophageal Cancer Treated at a Safety-Net Hospital. *Seminars in Thoracic & Cardiovascular Surgery*. 2020;32(2):347-354. doi:10.1053/j.semtcvs.2019.12.008

11. Betjemann JP, Thompson AC, Santos-Sánchez C, Garcia PA, Ivey SL. Distinguishing language and race disparities in epilepsy surgery. *Epilepsy & Behavior*. 2013;28(3):444-449. doi:10.1016/j.yebeh.2013.06.020
12. Varady NH, d'Amonville S, Chen AF, d'Amonville S. Electronic Patient Portal Use in Orthopaedic Surgery Is Associated with Disparities, Improved Satisfaction, and Lower No-Show Rates. *Journal of Bone & Joint Surgery, American Volume*. 2020;102(15):1336-1343. doi:10.2106/JBJS.19.01080
13. Witt E, Eruchalu C, Dey T, Bates D, Goodwin C, Ortega G. The role of patient primary language in access to brain tumor resection: Evaluating emergent admission and hospital volume. *JOURNAL OF CANCER POLICY*. 2021;30. doi:10.1016/j.jcpc.2021.100306
14. Maurer LR, Allar BG, Perez NP, et al. Non-English Primary Language is Associated with Emergency Surgery for Diverticulitis. *Journal of Surgical Research*. 2021;268:643-649. doi:10.1016/j.jss.2021.07.042
15. Nashed M, Glantz MJ, Linskey ME, Bota DA. Access to specialized treatment by adult Hispanic brain tumor patients: findings from a single-institution retrospective study. *Community Oncology*. 2012;9(9):283-288.
16. Thompson A, Ivey S, Lahiff M, Betjemann J. Delays in time to surgery for minorities with temporal lobe epilepsy. *EPILEPSIA*. 2014;55(9):1339-1346. doi:10.1111/epi.12700
17. Jaiswal K, Hull M, Furniss AL, Doyle R, Gayou N, Bayliss E. Delays in Diagnosis and Treatment of Breast Cancer: A Safety-Net Population Profile. *J Natl Compr Canc Netw*. 2018;16(12):1451-1457. doi:10.6004/jnccn.2018.7067
18. John-Baptiste A, Naglie G, Tomlinson G, et al. The effect of English language proficiency on length of stay and in-hospital mortality. *J Gen Intern Med*. 2004;19(3):221-228. doi:10.1111/j.1525-1497.2004.21205.x
19. Tang EW, Go J, Kwok A, et al. The relationship between language proficiency and surgical length of stay following cardiac bypass surgery. *European Journal of Cardiovascular Nursing*. 2016;15(6):438-446. doi:10.1177/1474515115596645
20. Inagaki E, Farber A, Kalish J, et al. Role of language discordance in complication and readmission rate after infrainguinal bypass. *Journal of Vascular Surgery*. 2017;66(5):1473-1478. doi:10.1016/j.jvs.2017.03.453
21. Hyun KK, Redfern J, Woodward M, et al. Is There Inequity in Hospital Care Among Patients With Acute Coronary Syndrome Who Are Proficient and Not Proficient in English Language? Analysis of the SNAPSHOT ACS Study. *Journal of Cardiovascular Nursing*. 2017;32(3):288-295. doi:10.1097/JCN.0000000000000342
22. Feeney T, Cassidy M, Tripodis Y, et al. Association of Primary Language with Outcomes After Operations Typically Performed to Treat Cancer: Analysis of a Statewide Database. *Ann Surg Oncol*. 2019;26(9):2684-2693. doi:10.1245/s10434-019-07484-8

23. Feeney T, Sanchez S, Tripodis Y, et al. The Association of Primary Language With Emergency General Surgery Outcomes Using a Statewide Database. *JOURNAL OF SURGICAL RESEARCH*. 2019;244:484-491. doi:10.1016/j.jss.2019.06.082
24. Feeney T, Park C, Godley F, et al. Provider–patient Language Discordance and Cancer Operations: Outcomes from a Single Center Linked to a State Vital Statistics Registry. *World J Surg*. 2020;44(10):3324-3332. doi:10.1007/s00268-020-05614-y
25. Bernstein JA, Sharan M, Lygrisse KA, Lajam CM. The Need for an Interpreter Increases Length of Stay and Influences Postoperative Disposition Following Primary Total Joint Arthroplasty. *Journal of Arthroplasty*. 2020;35(9):2405-2409. doi:10.1016/j.arth.2020.04.083
26. Witt EE, Eruchalu CN, Dey T, Bates DW, Goodwin CR, Ortega G. Non-English Primary Language Is Associated with Short-Term Outcomes After Supratentorial Tumor Resection. *World Neurosurgery*. 2021;155:e484-e502. doi:10.1016/j.wneu.2021.08.087
27. Manuel SP, Nguyen K, Karliner LS, Ward DT, Fernandez A. Association of English Language Proficiency With Hospitalization Cost, Length of Stay, Disposition Location, and Readmission Following Total Joint Arthroplasty. *JAMA Network Open*. 2022;5(3):e221842-e221842. doi:10.1001/jamanetworkopen.2022.1842
28. Manuel SP, Chia ZK, Raygor KP, Fernández A. Association of Language Barriers With Process Outcomes After Craniotomy for Brain Tumor. *Neurosurgery*. 2022;91(4):590-595. doi:10.1227/neu.0000000000002080
29. Stolarski AE, Alonso A, Aly S, et al. The impact of English proficiency on outcomes after bariatric surgery. *Surg Endosc*. 2022;36(10):7385-7391. doi:10.1007/s00464-022-09148-3
30. Koo J, Bacchi S, Stretton B, et al. Language and gender barriers to pain control after general surgery. *ANZ JOURNAL OF SURGERY*. doi:10.1111/ans.18164
31. Schwartz HEM, Matthay ZA, Menza R, et al. Inequity in discharge pain management for trauma patients with limited English proficiency. *Journal of Trauma & Acute Care Surgery*. 2021;91(5):898-902. doi:10.1097/TA.0000000000003294
32. Dowsey MM, Broadhead ML, Stoney JD, Choong PF. Outcomes of Total Knee Arthroplasty in English-Versus Non–English-Speaking Patients. *J Orthop Surg (Hong Kong)*. 2009;17(3):305-309. doi:10.1177/230949900901700312
33. Wong D, Roth E, Sokas C, et al. Preventable Emergency Department Visits After Colorectal Surgery. *DISEASES OF THE COLON & RECTUM*. 2021;64(11):1417-1425. doi:10.1097/DCR.0000000000002127
34. Danilowicz DA, Gabriel HP. Postcardiotomy psychosis in non-English-speaking patients. *Psychiatry Med*. 1971;2(4):314-320. doi:10.2190/3LRQ-NR4X-BFHM-OPYW
35. Dzioba RB, Doxey NC. A prospective investigation into the orthopaedic and psychologic predictors of outcome of first lumbar surgery following industrial injury. *Spine (Phila Pa 1976)*. 1984;9(6):614-623. doi:10.1097/00007632-198409000-00013



36. Doxey NC, Dzioba RB, Mitson GL, Lacroix JM. Predictors of outcome in back surgery candidates. *J Clin Psychol*. 1988;44(4):611-622. doi:10.1002/1097-4679(198807)44:4<611::aid-jclp2270440419>3.0.co;2-g
37. NAYLOR G. IRIS PROLAPSE - WHO - WHEN - WHY. *EYE*. 1993;7:465-467. doi:10.1038/eye.1993.94
38. John-Baptiste A, Naglie G, Tomlinson G, et al. The effect of English language proficiency on length of stay and in-hospital mortality. *J Gen Intern Med*. 2004;19(3):221-228. doi:10.1111/j.1525-1497.2004.21205.x
39. Ernest CS, Elliott PC, Murphy BM, et al. Predictors of cognitive function in candidates for coronary artery bypass graft surgery. *J Int Neuropsychol Soc*. 2007;13(2):257-266. doi:10.1017/S1355617707070282
40. Bandyopadhyay M, Markovic M, Manderson L. Women's perspectives of pain following day surgery in Australia. *Aust J Adv Nurs*. 2007;24(4):19-23.
41. Clapp B, Jarmillo M, Vigil V, et al. Patient comprehension and recall of laparoscopic surgery and outcomes in a non-English speaking population. *JLS*. 2007;11(2):242-245.
42. Hawley ST, Janz NK, Hamilton A, et al. Latina patient perspectives about informed treatment decision making for breast cancer. *Patient Educ Couns*. 2008;73(2):363-370. doi:10.1016/j.pec.2008.07.036
43. Maly R, Liu Y, Kwong E, Thind A, Diamant A. Breast Reconstructive Surgery in Medically Underserved Women With Breast Cancer The Role of Patient-Physician Communication. *CANCER*. 2009;115(20):4819-4827. doi:10.1002/cncr.24510
44. Dowsey MM, Broadhead ML, Stoney JD, Choong PF. Outcomes of Total Knee Arthroplasty in English-Versus Non-English-Speaking Patients. *J Orthop Surg (Hong Kong)*. 2009;17(3):305-309. doi:10.1177/230949900901700312
45. Halpern MT, Holden DJ. Patient and health system disparities in timeliness of treatment for individuals with colorectal cancer (CRC). *Journal of Clinical Oncology*. 2009;27:6540-6540.
46. Nielsen SS, He Y, Ayanian JZ, et al. Quality of cancer care among foreign-born and US-born patients with lung or colorectal cancer. *Cancer (0008543X)*. 2010;116(23):5497-5506. doi:10.1002/cncr.25546
47. Clark S, Mangram A, Ernest D, Lebron R, Peralta L. The Informed Consent: A Study of the Efficacy of Informed Consents and the Associated Role of Language Barriers. *JOURNAL OF SURGICAL EDUCATION*. 2011;68(2):143-147. doi:10.1016/j.jsurg.2010.09.009
48. Campesino M, Koithan M, Ruiz E, et al. Surgical treatment differences among Latina and African American breast cancer survivors. *Oncol Nurs Forum*. 2012;39(4):E324-331. doi:10.1188/12.ONF.E324-E331
49. Alnaes AH. Lost in translation: cultural obstructions impede living kidney donation among minority ethnic patients. *Camb Q Healthc Ethics*. 2012;21(4):505-516. doi:10.1017/S0963180112000278

50. Betjemann J, Thompson A, Santos-Sanchez C, Garcia P, Ivey S. Distinguishing language and race disparities in epilepsy surgery. *EPILEPSY & BEHAVIOR*. 2013;28(3):444-449. doi:10.1016/j.yebeh.2013.06.020
51. Dowsey M, Nikpour M, Choong P. Outcomes following large joint arthroplasty: does socio-economic status matter? *BMC MUSCULOSKELETAL DISORDERS*. 2014;15. doi:10.1186/1471-2474-15-148
52. Ankuda CK, Block SD, Cooper Z, et al. Measuring critical deficits in shared decision making before elective surgery. *Patient Education & Counseling*. 2014;94(3):328-333. doi:10.1016/j.pec.2013.11.013
53. Lopez M, Kaplan C, Napoles A, Hwang E, Livaudais J, Karliner L. Satisfaction with treatment decision-making and treatment regret among Latinas and non-Latina whites with DCIS. *PATIENT EDUCATION AND COUNSELING*. 2014;94(1):83-89. doi:10.1016/j.pec.2013.09.005
54. Alley MC, Mason AS, Tybor DJ, Pevear ME, Baratz MD, Smith EL. Ethnic Barriers to Utilization of Total Joint Arthroplasty Among Chinese Immigrants in the United States. *Journal of Arthroplasty*. 2016;31(9):1873-1877.e2. doi:10.1016/j.arth.2016.02.046
55. Patel DN, Wakeam E, Genoff M, Mujawar I, Ashley SW, Diamond LC. Preoperative consent for patients with limited English proficiency. *Journal of Surgical Research*. 2016;200(2):514-522. doi:10.1016/j.jss.2015.09.033
56. Inagaki E, Zhu CK, Farber A, et al. Role of language discordance in readmission rate and complications after infrainguinal bypass. *J Vasc Surg*. 2016;63(6):181S. doi:10.1016/j.jvs.2016.03.306
57. Spence J, Bosch J, Sharma M, et al. Predictors of cognitive decline after cardiac surgery: An evaluation of the CABG off or on pump revascularization study (CORONARY) cohort. *Can J Cardiol*. 2017;33(10):S36. doi:10.1016/j.cjca.2017.07.089
58. Talamantes E, Norris KC, Mangione CM, et al. Linguistic Isolation and Access to the Active Kidney Transplant Waiting List in the United States. *Clin J Am Soc Nephrol*. 2017;12(3):483-492. doi:10.2215/CJN.07150716
59. Jaiswal K, Hull M, Furniss A, Doyle R, Gayou N, Bayliss E. Delays in Diagnosis and Treatment of Breast Cancer: A Safety-Net Population Profile. *JOURNAL OF THE NATIONAL COMPREHENSIVE CANCER NETWORK*. 2018;16(12):1451-1457. doi:10.6004/jnccn.2018.7067
60. Yoo F, Ference EH, Kuan EC, Lee JT, Wang MB, Suh JD. Evaluation of patient nasal saline irrigation practices following endoscopic sinus surgery. *Int Forum Allergy Rhinol*. 2018;8(1):32-40. doi:10.1002/alr.22034
61. Talutis SD, Kuhnen AH, Zhu C, Pearlman K, Hall J. Effect of primary language on readmission after colorectal surgery. *Dis Colon Rectum*. 2018;61(5):e166-e167. doi:10.1097/DCR.0000000000001104

62. Shiraev T, Durur E, Robinson D. Factors Predicting Noncompliance with Follow-up after Endovascular Aneurysm Repair. *ANNALS OF VASCULAR SURGERY*. 2018;52:30-35. doi:10.1016/j.avsg.2018.03.037
63. Patel A, Wang W, Warnack E, et al. Surgical treatment of young women with breast cancer: Public vs private hospitals. *BREAST JOURNAL*. 2019;25(4):625-630. doi:10.1111/tbj.13294
64. Feeney T, Cassidy M, Tripodis Y, et al. Association of Primary Language with Outcomes After Operations Typically Performed to Treat Cancer: Analysis of a Statewide Database. *ANNALS OF SURGICAL ONCOLOGY*. 2019;26(9):2684-2693. doi:10.1245/s10434-019-07484-8
65. Rosenbloom JM, Jackson J, Alegria M, Alvarez K. Healthcare provider perceptions of disparities in perioperative care. *J Natl Med Assoc*. 2019;111(6):616-624. doi:10.1016/j.jnma.2019.07.003
66. Schultz KS, Phatak UR, Hall JF, Favuzza J. Impact of Insurance Status on Clinical Outcomes after Colorectal Surgery at a Safety-Net Hospital. *J Am Coll Surg*. 2020;231(4):e101. doi:10.1016/j.jamcollsurg.2020.08.257
67. Cataneo JL, Minhem M, M O'Rear J, et al. Socioeconomic Status and English Language Proficiency Alter Outcomes after Appendectomy. *Journal of the American College of Surgeons*. 2020;231(4):e138-e139. doi:10.1016/j.jamcollsurg.2020.08.364
68. Hong J, De Roulet A, Chao S. Equity in Postoperative Outcomes in Geriatric Patients Requiring Non-elective Colectomy in a High-density, Multilingual Hospital Setting. *J Am Coll Surg*. 2021;233(5):e29. doi:10.1016/j.jamcollsurg.2021.08.081
69. Burgoon ML, Miller PA, Hoover-Hankerson B, Strand N, Ross H. Challenges to Understanding and Compliance Among Surgical Patients in Low-Income Urban Teaching Hospitals. *Am Surg*. 2021;87(5):818-824. doi:10.1177/0003134820960078
70. Witt EE, Eruchalu CN, Dey T, Bates DW, Goodwin CR, Ortega G. Non-English Primary Language Is Associated with Short-Term Outcomes After Supratentorial Tumor Resection. *World Neurosurgery*. 2021;155:e484-e502. doi:10.1016/j.wneu.2021.08.087
71. Greenberg A, Schwartz H, Collins C, et al. Emergency general surgery utilization and disparities during COVID-19: an interrupted time-series analysis. *TRAUMA SURGERY & ACUTE CARE OPEN*. 2021;6(1). doi:10.1136/tsaco-2021-000679
72. Shehan JN, Alwani T, LeClair J, et al. Social determinants of health and treatment decisions in head and neck cancer. *Head Neck*. 2022;44(2):372-381. doi:10.1002/hed.26931
73. Tang A, Mittal A, Mooney C, et al. Factors delaying chemotherapy in patients with breast cancer at a safety-net hospital. *JOURNAL OF THE NATIONAL MEDICAL ASSOCIATION*. 2022;113(6):706-712. doi:10.1016/j.jnma.2021.08.035
74. de Crescenzo C, Chen YW, Adler J, et al. Increasing Frequency of Interpreting Services is Associated With Shorter Peri-operative Length of Stay. *J Surg Res*. 2022;270((de Crescenzo C., cdecrescenzo@mgh.harvard.edu; Chen Y.-W.; Maurer L.R.; Chang D.C.;

- Yeh H.) Department of Transplant Surgery, Massachusetts General Hospital/Harvard Medical School, Boston, MA, United States):178-186. doi:10.1016/j.jss.2021.09.006
75. Norris AC, Mears SC, Siegel ER, Barnes CL, Stambough JB. Social Needs of Patients Undergoing Total Joint Arthroplasty. *J Arthroplasty*. 2022;37(7S):S416-S421. doi:10.1016/j.arth.2021.11.019
76. Khan F, Soodana-Prakash N, Martin L, Syan R, Amin K. Language-Related Disparities in Acute Postoperative Pain Management Following Pelvic Floor Reconstructive Surgery: Does English Proficiency Matter? *INTERNATIONAL UROGYNECOLOGY JOURNAL*. 2022;33(SUPPL 2):S516-S517.
77. Dirix M, Philipse E, Vleut R, et al. Timing of the pre-transplant workup for renal transplantation: is there room for improvement? *CLINICAL KIDNEY JOURNAL*. doi:10.1093/ckj/sfac006
78. Barnard J, Milne T, Teo K, Weston M, Israel L, Peng S. Causes and costs of delayed closure of ileostomies in rectal cancer patients in Australasian units. *ANZ JOURNAL OF SURGERY*. doi:10.1111/ans.18092
79. Plocienniczak M, Rubin BR, Kolli A, Levi J, Tracy L. Outcome Disparities and Resource Utilization Among Limited English Proficient Patients After Tonsillectomy. *Ann Otol Rhinol Laryngol*. 2022;131(11):1241-1246. doi:10.1177/00034894211061996
80. Alwani T, Shehan JN, LeClair J, et al. Geographic Barriers Affect Follow-Up Care in Head and Neck Cancer. *Laryngoscope*. 2022;132(5):1022-1028. doi:10.1002/lary.29934
81. Jimenez N, Jackson DL, Zhou C, Ayala NC, Ebel BE. Postoperative pain management in children, parental english proficiency, and access to interpretation. *Hosp Pediatr*. 2014;4(1):23-30. doi:10.1542/hpeds.2013-0031
82. Dai X, Ryan MA, Clements AC, et al. The Effect of Language Barriers at Discharge on Pediatric Adenotonsillectomy Outcomes and Healthcare Contact. *Annals of Otolaryngology & Laryngology*. 2021;130(7):833-839. doi:10.1177/0003489420980176
83. Essex R, Cucos M, Dibley L. The impact of language and ethnicity on preparation for endoscopy: A prospective audit of an East London Hospital Ward. *J Eval Clin Pract*. 2021;27(4):877-884. doi:10.1111/jep.13490
84. Greene NEB, Fuentes-Juarez BN, Sabatini CSM MPH, Greene NE, Fuentes-Juárez BN, Sabatini CS. Access to Orthopaedic Care for Spanish-Speaking Patients in California. *Journal of Bone & Joint Surgery, American Volume*. 2019;101(18):e95-e95. doi:10.2106/JBJS.18.01080
85. Jaramillo J, Snyder E, Dunlap J, Wright R, Mendoza F, Bruzoni M. The Hispanic Clinic for Pediatric Surgery: A model to improve parent-provider communication for Hispanic pediatric surgery patients. *JOURNAL OF PEDIATRIC SURGERY*. 2016;51(4):670-674. doi:10.1016/j.jpedsurg.2015.08.065

86. Lee J, Pérez-Stable E, Gregorich S, et al. Increased Access to Professional Interpreters in the Hospital Improves Informed Consent for Patients with Limited English Proficiency. *JGIM: Journal of General Internal Medicine*. 2017;32(8):863-870. doi:10.1007/s11606-017-3983-4
87. Malevanchik L, Wheeler M, Gagliardi K, Karliner L, Shah SJ. Disparities After Discharge: The Association of Limited English Proficiency and Postdischarge Patient-Reported Issues. *Jt Comm J Qual Patient Saf*. 2021;47(12):775-782. doi:10.1016/j.jcjq.2021.08.013
88. Plancarte CA, Hametz P, Southern WN. Association Between English Proficiency and Timing of Analgesia Administration After Surgery. *Hospital Pediatrics*. 2021;11(11):1199-1204. doi:10.1542/hpeds.2020-005766
89. Qureshi M, Romesser P, Jalisi S, et al. The influence of limited English proficiency on outcome in patients treated with radiotherapy for head and neck cancer. *PATIENT EDUCATION AND COUNSELING*. 2014;97(2):276-282. doi:10.1016/j.pec.2014.07.031

## Supplementary Tables

eTable 1. Study Outcomes, Methods, and Results by Category

| Source                                     | Definition of Outcome                                                                                             | Statistical Methodology                 | Adjusted Covariates            | Measure of Association                                 | Magnitude and Direction of Associations Between LEP (vs. EP) and Outcome Measures | Significant Directionality |
|--------------------------------------------|-------------------------------------------------------------------------------------------------------------------|-----------------------------------------|--------------------------------|--------------------------------------------------------|-----------------------------------------------------------------------------------|----------------------------|
| <b>Access to Surgical Care</b>             |                                                                                                                   |                                         |                                |                                                        |                                                                                   |                            |
| Receipt of Surgery                         |                                                                                                                   |                                         |                                |                                                        |                                                                                   |                            |
| Sridhar et al, <sup>9</sup> 2019           | Receipt of curative pancreatic cancer surgery                                                                     | Pearson's chi-square test               | None                           | Independence between LEP status and receipt of surgery | No association between LEP and receipt of surgery (p-value = 0.79)                | .                          |
| Asokan et al, <sup>10</sup> 2020           | Receipt of esophagectomy in patients with operable stage                                                          | Pearson's chi-square test               | None                           | Independence between LEP status and receipt of surgery | LEP and receipt of surgery were independent (p-value = 0.103)                     | .                          |
| Betjemann et al, <sup>11</sup> 2020        | Underwent anterior temporal lobectomy after screening confirmed refractory epilepsy and mesial temporal sclerosis | Multivariable logistic regression model | Age, race/ethnicity, ictal EEG | Adjusted OR for use in surgery (LEP/EP)                | Reduced surgery utilization in LEP, aOR 0.38 (0.15-0.93)                          | ↓                          |
| Availability of High-quality Surgical Care |                                                                                                                   |                                         |                                |                                                        |                                                                                   |                            |

|                                  |                                                                                                                                     |                                           |                                                                                                                                           |                                                                   |                                                                                     |   |
|----------------------------------|-------------------------------------------------------------------------------------------------------------------------------------|-------------------------------------------|-------------------------------------------------------------------------------------------------------------------------------------------|-------------------------------------------------------------------|-------------------------------------------------------------------------------------|---|
| Varady et al, <sup>12</sup> 2020 | Use of electronic patient portal (EPP) by the time of orthopedic surgical procedure, defined as having completed 1> online sessions | Multivariable logistic regression model   | Age, sex, race, medications, education level, insurance type, income, distance to hospital, provider subspecialty, primary care physician | Adjusted OR for EPP utilization (LEP/EP)                          | Reduced use among LEP: aOR, 0.42 (0.36-0.50)                                        | ↓ |
| Witt et al, <sup>13</sup> 2021   | Total number of supratentorial tumor resections per year (higher vs. lower volume)                                                  | Multivariable ordinal logistic regression | Age, sex, diagnosis, insurance status, household income, year of discharge, residence, Charlson comorbidity score                         | Adjusted OR for higher hospital volume (Spanish/EP OR NENS/EP)    | LEP (Spanish) vs. EP, aOR 0.84 (0.67-1.05); LEP (NENS) vs. EP, aOR 1.07 (0.85-1.35) | . |
| Elective vs. Emergency surgery   |                                                                                                                                     |                                           |                                                                                                                                           |                                                                   |                                                                                     |   |
| Witt et al, <sup>13</sup> 2021   | Routine admission vs. emergent or urgent admission for neuro-oncologic surgery                                                      | Multivariable logistic regression model   | Age, sex, diagnosis, insurance status, household income, year of discharge, residence, Charlson comorbidity score                         | Adjusted OR for emergent/urgent admission (Spanish/EP OR NENS/EP) | LEP (Spanish) vs. EP, aOR 1.02 (0.78-1.33); LEP (NENS) vs. EP, aOR 0.48 (0.34-0.67) | ↓ |
| Maurer et al, <sup>14</sup> 2021 | Elective vs. emergent or urgent admission for colectomy                                                                             | Multivariable logistic regression model   | Age, sex, insurance status, income, data year, Charlson comorbidity index                                                                 | Adjusted OR for limited access (LEP/EP)                           | LEP associated decreased odds of elective surgery: aOR 0.74 (0.62-0.88)             | ↓ |

### Delay in Surgical Care

|                                      |                                                                                                                              |                                         |                                                                                             |                                              |                                                                                                                       |   |
|--------------------------------------|------------------------------------------------------------------------------------------------------------------------------|-----------------------------------------|---------------------------------------------------------------------------------------------|----------------------------------------------|-----------------------------------------------------------------------------------------------------------------------|---|
| Nashed et al, <sup>15</sup> 2012     | Time from diagnosis to craniotomy                                                                                            | Log rank test of equality               | None                                                                                        | Difference in time-to-event between LEP & EP | No difference in time to surgery (p-value=0.26)                                                                       | . |
| Thompson et al, <sup>16</sup> 2014   | Time from presurgical evaluation to anterior temporal lobectomy                                                              | Log rank test of equality               | None                                                                                        | Difference in time-to event between LEP & EP | LEP associated with longer time to surgery than EP (p-value=0.0085)                                                   | ↑ |
| Jaiswal et al, <sup>17</sup> 2018    | Time from breast cancer diagnosis to initial treatment (delayed treatment ≥37 days; timely treatment <37 days)               | Simple logistic regression model        | None                                                                                        | Unadjusted OR for delayed treatment (LEP/EP) | LEP associated with longer time to treatment: OR, 5.0 (95% CI N/S; p-value=0.0045)                                    | ↑ |
| Silverstein et al, <sup>8</sup> 2022 | Time from date of referral to first appointment with a MIGS provider (delayed interval > 30 days; timely interval < 30 days) | Multivariable logistic regression model | Referral indication (chronic pelvic pain vs. diagnosis that require operative intervention) | Adjusted OR for delayed interval (LEP/EP)    | Delay in surgical care for LEP patients: pandemic cohort, aOR 3.20 (1.60-6.40); historic cohort, aOR 1.16 (0.55-2.41) | ↑ |

### Length of Stay



|                                         |                                                                                                                                                         |                                           |                                                                                                                              |                                               |                                                                                                                                                                                                                                                                                                                                                                                                                          |    |
|-----------------------------------------|---------------------------------------------------------------------------------------------------------------------------------------------------------|-------------------------------------------|------------------------------------------------------------------------------------------------------------------------------|-----------------------------------------------|--------------------------------------------------------------------------------------------------------------------------------------------------------------------------------------------------------------------------------------------------------------------------------------------------------------------------------------------------------------------------------------------------------------------------|----|
| John-Baptiste et al, <sup>18</sup> 2004 | LOS during surgical admission                                                                                                                           | Multivariable log-linear regression model | Age, gender, discharge disposition, fiscal year, Charlson comorbidity score, number of comorbidities, marital status, income | Adjusted means ratio of LOS (LEP/EP)          | Increased or no difference in LOS: CABG, aMR 1.07 (1.03-1.12); Prostatectomy, aMR 1.02 (0.93-1.11); Craniotomy, aMR 1.15 (1.02-1.31); Hysterectomy, aMR 0.97 (0.92-1.02); Intestinal & rectal, aMR 1.10 (1.02-1.19); Elective hip replacement, aMR 1.13 (1.03-1.23); Hip fracture, aMR 0.98 (0.88-1.09); Head & neck, aMR 0.93 (0.73-1.19); Elective AAA repair, aMR 1.00 (0.84-1.20); AAA rupture, aMR 1.46 (0.48-4.45) | .↑ |
| MacDonald et al, <sup>5</sup> 2010      | LOS (long LOS, 7>days; short LOS, 6<days) after hip and knee arthroplasty                                                                               | Multivariable logistic regression model   | Age, comorbidities, required home support, living alone                                                                      | Adjusted OR for long LOS (LEP/EP)             | LEP patients had prolonged LOS: aOR 4.15 (95% CI N/S; p-value <0.05)                                                                                                                                                                                                                                                                                                                                                     | ↑  |
| Tang et al, <sup>19</sup> 2016          | LOS defined as time from CSICU admission to hospital discharge after CABG. LOS was categorized into quartiles (1-5 days, 6 days, 7-8 days, and >9 days) | Multivariate polynomial regression model  | Age, marital status, postoperative infection                                                                                 | Adjusted OR for each quartile of LOS (LEP/EP) | No difference in LOS: 6 days vs 1-5 days aOR 1.52 (0.77-2.98); 7-8 days vs. 1-5 days aOR 1.55 (0.81-2.97); >9 days vs 1-5 days aOR 1.85 (0.94-3.67)                                                                                                                                                                                                                                                                      | .  |

|                                   |                                                      |                                      |                                                                                                                                                                       |                                         |                                                                          |   |
|-----------------------------------|------------------------------------------------------|--------------------------------------|-----------------------------------------------------------------------------------------------------------------------------------------------------------------------|-----------------------------------------|--------------------------------------------------------------------------|---|
| Inagaki et al, <sup>20</sup> 2017 | Postoperative LOS after infrainguinal bypass surgery | Multivariable gamma regression model | Age, gender, race, ethnicity, insurance status, tobacco use, CAD, CHF, COPD, cerebrovascular accident, renal failure, DM, urgency of care, outflow artery, graft type | Adjusted means ratio of LOS (LEP/EP)    | No difference in LOS: aMR 1.02 (0.85-1.23)                               | . |
| Hyun et al, <sup>21</sup> 2017    | LOS in days after admission with suspected ACS event | Multiple linear regression model     | Gender, GRACE risk score, previous diagnosis and procedures, presenting diagnosis, medications, PCI, CABG                                                             | Difference in mean LOS between LEP & EP | No difference in LOS between LEP and EP: Effect size N/S (p-value =0.30) | . |

|                                  |                                                  |                                                                    |                                                                                                                                                                                                                                                                                                      |                                              |                                                                                                                                                                                                                                                                                                                                                                                    |       |
|----------------------------------|--------------------------------------------------|--------------------------------------------------------------------|------------------------------------------------------------------------------------------------------------------------------------------------------------------------------------------------------------------------------------------------------------------------------------------------------|----------------------------------------------|------------------------------------------------------------------------------------------------------------------------------------------------------------------------------------------------------------------------------------------------------------------------------------------------------------------------------------------------------------------------------------|-------|
| Feeney et al, <sup>22</sup> 2019 | LOS in days after oncologic surgery              | Generalized linear mixed model with negative binomial distribution | Age, gender, race, insurance type, income, DM, obesity, psychiatric illness, alcohol abuse, HTN, cancer with metastasis, chronic lung disease, peripheral vascular disease, renal failure, number of comorbidities/procedures, risk class, country of residence, cancer, weekend admission, hospital | Adjusted IRR for LOS (Spanish/EP OR NENS/EP) | No difference in LOS: LEP (Spanish) vs. EP, aIRR 1.02 (0.98-1.06); LEP (NENS) vs. EP, aIRR 1.03 (0.99-1.07)                                                                                                                                                                                                                                                                        | .     |
| Feeney et al, <sup>23</sup> 2019 | LOS during hospitalization for emergency surgery | Generalized linear mixed model with negative binomial distribution | Age, sex, race, insurance type, income, comorbidities, number of hospital procedures, risk class, country of residence, cancer, weekend admission, admission hour                                                                                                                                    | Adjusted IRR for LOS (Spanish/EP OR NENS/EP) | Spanish speakers had reduced LOS after appendectomy: LEP (Spanish) vs. EP, aIRR 0.92 (0.89-0.95), LEP (NENS) vs. EP, aIRR 0.96 (0.92-1.00); cholecystectomy, LEP (Spanish) vs. EP, aIRR 1.02 (0.99-1.04), LEP (NENS) vs. EP, aIRR 1.03 (0.99-1.07); Spanish speakers had reduced LOS after adhesiolysis: LEP (Spanish) vs. EP, aIRR 0.93 (0.88-0.97), LEP (NENS) vs. EP, aIRR 0.94 | Mixed |

|                                      |                                                    |                                                  |                                                                                                                                                           |                                         |                                                                                                                                                                |   |
|--------------------------------------|----------------------------------------------------|--------------------------------------------------|-----------------------------------------------------------------------------------------------------------------------------------------------------------|-----------------------------------------|----------------------------------------------------------------------------------------------------------------------------------------------------------------|---|
|                                      |                                                    |                                                  |                                                                                                                                                           |                                         | (0.89-0.99); Spanish speakers had longer LOS after high-risk procedures: LEP (Spanish) vs. EP, aIRR 1.14 (1.10-1.20), LEP (NENS) vs. EP, aIRR 1.04 (1.00-1.09) |   |
| Feeney et al, <sup>24</sup> 2020     | LOS in days                                        | Multivariable negative binomial regression model | Age, gender, race/ethnicity, risk score, insurance status, income, BMI, emergency surgery, Elixhauser comorbidity score, ASA class, and weekend admission | Adjusted IRR for LOS (LEP/EP)           | No difference in LOS: aIRR 0.99 (0.88-1.10)                                                                                                                    | . |
| Bernstein, et al, <sup>25</sup> 2020 | LOS in days after primary total joint arthroplasty | Multivariable linear regression model            | Age, ASA status                                                                                                                                           | Difference in mean LOS between LEP & EP | Longer LOS for LEP-I or LEP-N than EP (2.72 or 2.44 vs. 2.19 days; p-value <0.0001 and p-value=0.012, respectively)                                            | ↑ |

|                                  |                                                 |                                                  |                                                                                                                                                                                                                       |                                                            |                                                                                                                   |    |
|----------------------------------|-------------------------------------------------|--------------------------------------------------|-----------------------------------------------------------------------------------------------------------------------------------------------------------------------------------------------------------------------|------------------------------------------------------------|-------------------------------------------------------------------------------------------------------------------|----|
| Witt et al, <sup>26</sup> 2021   | Total LOS after neuro-oncologic surgery         | Multivariable negative binomial regression model | Age, sex, insurance status, income, Charlson Comorbidity Index, year of discharge, weekend admission, emergency admission, hospital volume, inpatient complication, total number of procedures, discharge disposition | Adjusted IRR for LOS (Spanish/EP OR NENS/EP)               | No difference in LOS: LEP (Spanish) vs. EP, aIRR 1.02 (0.96-1.09); LEP (NENS) vs. EP, aIRR 1.04 (0.98-1.11)       | .↑ |
|                                  | Postoperative LOS after neuro-oncologic surgery |                                                  |                                                                                                                                                                                                                       | Adjusted IRR for postoperative LOS (Spanish/EP OR NENS/EP) | Longer postop LOS for NENS: LEP (Spanish) vs. EP, aIRR 1.01 (0.92-1.10); LEP (NENS) vs. EP, aIRR 1.10 (1.03-1.18) |    |
| Manuel et al, <sup>27</sup> 2022 | Total LOS after total knee and hip arthroplasty | Multivariable negative binomial regression model | Age, sex, race/ethnicity, insurance type, ASA status, BMI, surgical case class, case length, estimated blood loss, discharge disposition                                                                              | Adjusted IRR for LOS (LEP/EP)                              | Increased LOS for LEP: aIRR 1.15 (1.07-1.25)                                                                      | ↑  |
| Manuel et al, <sup>28</sup> 2022 | Total LOS after craniotomy                      | Multivariable negative binomial regression model | Age, sex, race/ethnicity, insurance type, ASA status, surgical case class, discharge disposition                                                                                                                      | Adjusted IRR for LOS (LEP/EP)                              | Increased LOS for LEP: aIRR 1.11 (1.00-1.24)                                                                      | ↑  |

|                                      |                                                                                  |                                                  |                                                                                                                                              |                                                      |                                                                                                                                                                                                   |    |
|--------------------------------------|----------------------------------------------------------------------------------|--------------------------------------------------|----------------------------------------------------------------------------------------------------------------------------------------------|------------------------------------------------------|---------------------------------------------------------------------------------------------------------------------------------------------------------------------------------------------------|----|
| Stolarski et al, <sup>29</sup> 2022  | LOS from index operation (laparoscopic sleeve gastrectomy or gastric bypass)     | Multivariable negative binomial regression model | Age, sex, race, insurance status, ASA class, smoking status, year of operation, procedure type                                               | Adjusted IRR for LOS (LEP/EP)                        | No difference in LOS: aIRR 0.94 (0.84-1.04)                                                                                                                                                       | .  |
| Kovoor, et al, <sup>30</sup> 2022    | LOS dichotomized at 75th percentile (>5 days) for general surgery admission      | Multivariable logistic regression model          | Age, gender, marital status, pain scores, in-hospital mortality, birth country, religion, SES, Charlson Comorbidity Index, time of admission | Adjusted OR for LOS $\geq$ 5 days (LEP/EP)           | No difference in LOS: aOR, 1.08 (0.94-1.25)                                                                                                                                                       | .  |
| <b>Discharge Disposition</b>         |                                                                                  |                                                  |                                                                                                                                              |                                                      |                                                                                                                                                                                                   |    |
| Bernstein, et al, <sup>25</sup> 2020 | Discharge disposition after primary total joint arthroplasty                     | Multivariable linear regression model            | Age, ASA status                                                                                                                              | Difference in discharge disposition between LEP & EP | Increased disposition to skilled nursing for LEP-I than EP (25.3% vs 9.3%; p-value <0.0001); no difference in disposition to skilled nursing between LEP-N and EP (14.0% vs. 9.3%; p-value=0.144) | .↑ |
| Witt et al, <sup>26</sup> 2021       | Discharge disposition to rehabilitation (vs. home) after neuro-oncologic surgery | Multivariable logistic regression model          | Age, sex, insurance status, income, Charlson Comorbidity Index, year of discharge, weekend admission, emergency                              | Adjusted OR for rehabilitation discharge (LEP/EP)    | Decreased or no difference in disposition to skilled nursing for LEP than EP: LEP (Spanish) vs. EP, aOR 0.65(0.45-0.93); LEP (NENS) vs. EP, aOR 1.00 (0.80-1.25)                                  | .↓ |

| admission, hospital volume              |                                                                                           |                                         |                                                                                                                       |                                                     |                                                                                                                                                                                                                          |    |
|-----------------------------------------|-------------------------------------------------------------------------------------------|-----------------------------------------|-----------------------------------------------------------------------------------------------------------------------|-----------------------------------------------------|--------------------------------------------------------------------------------------------------------------------------------------------------------------------------------------------------------------------------|----|
| Manuel et al, <sup>27</sup> 2022        | Discharge disposition to skilled facility (vs. home) after total knee or hip arthroplasty | Multivariable logistic regression model | Age, sex, race/ethnicity, insurance type, ASA status, BMI, surgical case class, case length, and estimated blood loss | Adjusted OR for skilled facility discharge (LEP/EP) | Increased discharge to skilled facility for LEP: aOR 1.41 (1.03-1.93)                                                                                                                                                    | ↑  |
| Manuel et al, <sup>28</sup> 2022        | Discharge disposition to skilled facility (vs. home) after craniotomy                     | Multivariable logistic regression model | Age, sex, race/ethnicity, insurance type, ASA status, and surgical case class                                         | Adjusted OR for skilled facility discharge (LEP/EP) | Increased discharge to skilled facility for LEP: aOR 1.76 (1.13-2.72)                                                                                                                                                    | ↑  |
| <b>In-hospital Mortality</b>            |                                                                                           |                                         |                                                                                                                       |                                                     |                                                                                                                                                                                                                          |    |
| John-Baptiste et al, <sup>18</sup> 2004 | In-hospital death during surgical admission                                               | Multivariable logistic regression model | Age, Charlson comorbidity score                                                                                       | Adjusted OR for death (LEP/EP)                      | Increased or no difference in mortality: CABG, aOR 1.43 (0.97-2.11); Craniotomy, aOR 1.98 (1.34-2.94); Intestinal & rectal, aOR 0.60 (0.30-1.19); Hip fracture, aOR 0.66 (0.33-1.30); AAA rupture, aOR 7.34 (1.65-32.67) | .↑ |

|                                  |                                                            |                                                            |                                                                                                                                                                                                                                                                                        |                                                           |                                                                                                                                                                                                                                                                                                    |   |
|----------------------------------|------------------------------------------------------------|------------------------------------------------------------|----------------------------------------------------------------------------------------------------------------------------------------------------------------------------------------------------------------------------------------------------------------------------------------|-----------------------------------------------------------|----------------------------------------------------------------------------------------------------------------------------------------------------------------------------------------------------------------------------------------------------------------------------------------------------|---|
| Hyun et al, <sup>21</sup> 2017   | In-hospital death during admission for suspected ACS event | Multivariable logistic regression model                    | Gender, GRACE risk score, previous cardiac diagnosis and procedures, presenting diagnosis                                                                                                                                                                                              | Adjusted OR for in-hospital death (LEP/EP)                | No difference in mortality: aOR 1.77 (0.90-3.53)                                                                                                                                                                                                                                                   | . |
| Feeney et al, <sup>22</sup> 2019 | In-hospital all-cause mortality after oncologic surgery    | Generalized linear mixed model with Bernoulli distribution | Age, gender, race, insurance type, income, DM, obesity, psychiatric illness, alcohol abuse, HTN, cancer with metastasis, chronic lung disease, peripheral vascular disease, renal failure, number of comorbidities/procedures, LOS, risk class, country of residence, cancer, hospital | Adjusted OR for in-hospital death (Spanish/EP OR NENS/EP) | No difference in mortality: LEP (Spanish) vs. EP, aOR 0.67 (0.41-1.10); LEP (NENS) vs. EP, aOR 1.16 (0.77-1.75)                                                                                                                                                                                    | . |
| Feeney et al, <sup>23</sup> 2019 | In-hospital all-cause mortality after emergency surgery    | Generalized linear mixed model with Bernoulli distribution | Age, gender, race, insurance type, income, Elixhauser comorbidity score, number of comorbidities/procedures, LOS, risk class, country of residence, cancer                                                                                                                             | Adjusted OR for in-hospital death (Spanish/EP OR NENS/EP) | No difference in mortality: Appendectomy, LEP (Spanish) vs. EP, aOR 0.61 (0.14-2.60), LEP (NENS) vs. EP, aOR 0.84 (0.19-3.60); cholecystectomy, LEP (Spanish) vs. EP, aOR 0.41 (0.13-1.33), LEP (NENS) vs. EP, aOR 0.51 (0.18-1.43); adhesiolysis, LEP (Spanish) vs. EP, aOR 0.92 (0.43-2.00), LEP | . |



|                                   |                                                     |                                         |                                                                                                                            |                                                         |                                                                                                                                                |   |
|-----------------------------------|-----------------------------------------------------|-----------------------------------------|----------------------------------------------------------------------------------------------------------------------------|---------------------------------------------------------|------------------------------------------------------------------------------------------------------------------------------------------------|---|
|                                   |                                                     |                                         |                                                                                                                            |                                                         | (NENS) vs. EP, aOR 0.53 (0.23-1.22); high-risk procedures, LEP (Spanish) vs. EP, aOR 1.01 (0.68-1.50), aOR LEP (NENS) vs. EP, 0.89 (0.63-1.25) |   |
| Witt et al, <sup>26</sup> 2021    | In-hospital mortality after neuro-oncologic surgery | Pearson's chi-square test               | None                                                                                                                       | Difference in in-hospital mortality across LEP statuses | No difference across LEP statuses in in-hospital mortality (p-value = 0.127)                                                                   | . |
| Kovoor, et al, <sup>30</sup> 2022 | In-hospital mortality                               | Multivariable logistic regression model | Age, gender, marital status, LOS, pain scores, birth country, religion, SES, Charlson Comorbidity Index, time of admission | Adjusted OR for in-hospital mortality (LEP/EP)          | No difference in mortality (p-value = 0.17) and aOR not reported                                                                               | . |
| <b>Complications</b>              |                                                     |                                         |                                                                                                                            |                                                         |                                                                                                                                                |   |

|                                   |                                                                                                                |                                         |                                                                                                                                                                       |                                                                                                         |                                                                                                                             |   |
|-----------------------------------|----------------------------------------------------------------------------------------------------------------|-----------------------------------------|-----------------------------------------------------------------------------------------------------------------------------------------------------------------------|---------------------------------------------------------------------------------------------------------|-----------------------------------------------------------------------------------------------------------------------------|---|
| Inagaki et al, <sup>20</sup> 2017 | 30-day wound infections, 30-day adverse graft event after infrainguinal bypass surgery                         | Multivariable logistic regression model | Age, gender, race, ethnicity, insurance status, tobacco use, CAD, CHF, COPD, cerebrovascular accident, renal failure, DM, urgency of care, outflow artery, graft type | Adjusted OR for 30-day wound infections (LEP/EP)<br>Adjusted OR for 30-day adverse graft event (LEP/EP) | No difference in 30-day complications rate: wound infections, aOR1.87 (0.90-3.88); adverse graft event aOR 1.23 (0.62-2.45) | . |
| Hyun et al, <sup>21</sup> 2017    | In-hospital MACE; Delayed <18 months MACE after admission for ACS event                                        | Multivariable logistic regression model | Gender, GRACE risk score, previous cardiac diagnosis and procedures, presenting diagnosis, medications, PCI, CABG, referral to rehabilitation                         | Adjusted OR for in-hospital MACE (LEP/EP)<br>Adjusted OR for 18-month MACE (LEP/EP)                     | No difference in complications rate: in-hospital MACE, aOR 1.19 (0.85-1.65); MACE ≤18 months aOR 1.01 (0.65-1.57)           | . |
| Feeney et al, <sup>24</sup> 2020  | In-hospital major complications after cancer surgery based on NSQIP risk calculator major morbidity definition | Multivariable logistic regression model | Age, insurance status, operative risk score, Elixhauser comorbidity score                                                                                             | Adjusted OR for major complication (LEP/EP)                                                             | No difference in LOS: aOR 0.76 (0.39-1.45)                                                                                  | . |

|                                     |                                                                                                        |                                         |                                                                                                                                            |                                                                |                                                                                                                                                                            |    |
|-------------------------------------|--------------------------------------------------------------------------------------------------------|-----------------------------------------|--------------------------------------------------------------------------------------------------------------------------------------------|----------------------------------------------------------------|----------------------------------------------------------------------------------------------------------------------------------------------------------------------------|----|
| Witt et al, <sup>26</sup> 2021      | Presence of inpatient complications validated for supratentorial tumors                                | Multivariable logistic regression model | Age, sex, insurance status, income, Charlson Comorbidity Index, year of discharge, weekend admission, emergency admission, hospital volume | Adjusted OR for inpatient complication (Spanish/EP OR NENS/EP) | Increased complications in NENS patients: LEP (Spanish) vs. EP, 0.85 (0.63-1.15); LEP (NENS) vs. EP, 1.36 (1.06-1.75)                                                      | .↑ |
| Stolarski et al, <sup>29</sup> 2022 | Presence of 30-day complications after laparoscopic sleeve gastrectomy or gastric bypass               | Multivariable logistic regression model | Age, sex, race, insurance status, ASA class, smoking status, year of operation, and procedure type                                         | Adjusted OR for 30-day complications (LEP/EP)                  | No difference in complications: aOR 0.59 (0.32-1.05)                                                                                                                       | .  |
| <b>Pain Management</b>              |                                                                                                        |                                         |                                                                                                                                            |                                                                |                                                                                                                                                                            |    |
| Schwartz, et al, <sup>31</sup> 2021 | Total oral morphine equivalent (OME) prescribed at discharge after admission to trauma surgery service | Multivariable logistic regression model | Age, injury severity, activation level, injury type, traumatic brain injury, limb fracture, and discharge service                          | Adjusted OR for receiving discharge opioids (LEP/EP)           | LEP less likely to receive discharge opioid prescription: aOR 0.61 (0.44-0.85)                                                                                             | ↓  |
|                                     | Total amount of opioids prescribed at discharge after admission to trauma surgery service              | Multivariable quantile regression model |                                                                                                                                            | Difference in mean total OME between LEP & EP                  | LEP patients received 25.8 (-3.2-54.9) fewer OME than EP patients at 60th percentile; LEP patients received 45.0 (5.48-84.5) fewer OME than EP patients at 80th percentile | ↓  |

|                                   |                                                                                |                                         |                                                                                                                                                                                                                                                       |                                             |                                                                                                      |   |
|-----------------------------------|--------------------------------------------------------------------------------|-----------------------------------------|-------------------------------------------------------------------------------------------------------------------------------------------------------------------------------------------------------------------------------------------------------|---------------------------------------------|------------------------------------------------------------------------------------------------------|---|
| Kovoor, et al, <sup>30</sup> 2022 | Having median pain score $\geq 3$ during inpatient general surgical admission  | Multivariable logistic regression model | Age, gender, marital status, LOS, in-hospital mortality, birth country, religion, SES, Charlson Comorbidity Index, time of admission                                                                                                                  | Adjusted OR for having higher pain (LEP/EP) | LEP associated with lower pain scores: aOR 0.61 (0.52-0.71)                                          | ↓ |
| <b>Long-term Outcome</b>          |                                                                                |                                         |                                                                                                                                                                                                                                                       |                                             |                                                                                                      |   |
| Dowsey, et al, <sup>32</sup> 2009 | International Knee Society (IKS) score measure of function 12 months after TKA | Multivariable logistic regression model | Age, gender, birthplace, comorbid rheumatoid arthritis, obesity                                                                                                                                                                                       | Adjusted OR for IKS score >120 (LEP/EP)     | LEP associated with higher odds of having >120 IKS scores at 12-month follow-up: aOR 0.36 (0.16-0.8) | ↓ |
| Aggarwal et al, <sup>7</sup> 2022 | Patient-rated improvement 6 months after THA                                   | Multivariable logistic regression model | Age, sex, education, BMI, previous THA, lower back pain, lower limb arthritis, depression/anxiety, comorbidities, ASA status, expected pain, expected function, preoperative EQ-VAS, preoperative OHS, JSN (or KL for OHS model), radiographic scores | Adjusted OR for improvement (LEP/EP)        | No difference in patient rated improvement: aOR 0.83 (0.49-1.40)                                     | . |
|                                   | Oxford hip score (OHS), measure of function and pain 6 months after THA        | Multivariable linear regression model   |                                                                                                                                                                                                                                                       | Difference in mean OHS between LEP & EP     | LEP patients scored worse on OHS: -1.95 (-3.18-0.72)                                                 | ↓ |

|                                     |                                                                                                                                                   |                                         |                                                                                                                                                                                                                        |                                                                                                |                                                                                              |   |
|-------------------------------------|---------------------------------------------------------------------------------------------------------------------------------------------------|-----------------------------------------|------------------------------------------------------------------------------------------------------------------------------------------------------------------------------------------------------------------------|------------------------------------------------------------------------------------------------|----------------------------------------------------------------------------------------------|---|
| Stolarski et al, <sup>29</sup> 2022 | Excess weight loss at postoperative 1 year after laparoscopic sleeve gastrectomy or gastric bypass                                                | Multivariable linear regression model   | Age, sex, race, insurance status, ASA class, smoking status, year of operation, procedure type, BMI                                                                                                                    | Difference in mean EWL between LEP & EP                                                        | No difference in in EWL (regression coefficient, 95% CI, and p-value N/S)                    | . |
| <b>Readmission</b>                  |                                                                                                                                                   |                                         |                                                                                                                                                                                                                        |                                                                                                |                                                                                              |   |
| Wilbur et al, <sup>6</sup> 2016     | Readmission within 30 days after discharge from gynecologic oncology surgery admission                                                            | Mixed logistic regression               | Age, race, BMI, insurance type, length of index admission LOS, comorbidities, ostomy, primary diagnosis, primary procedure, tobacco use, alcohol use, depression, social work screen, medications at discharge, income | Adjusted OR for 30-day readmission (LEP/EP)                                                    | LEP associated with readmission: aOR 3.36 (1.01-11.15)                                       | ↑ |
| Inagaki et al, <sup>20</sup> 2017   | Unplanned readmission within 30-days of discharge, emergency department (ED) visit within 30 days of discharge after infrainguinal bypass surgery | Multivariable logistic regression model | Age, gender, race, ethnicity, insurance status, tobacco use, CAD, CHF, COPD, cerebrovascular accident, renal failure, DM, urgency of care, outflow artery, graft type                                                  | Adjusted OR for 30-day readmission (LEP/EP)<br>Adjusted OR for 30-day ED return visit (LEP/EP) | No difference in readmission, aOR 1.51 (0.77-2.95);<br>ED return visit, aOR 1.28 (0.58-2.83) | . |

|                                  |                                                                    |                                                            |                                                                                                                                                                                                                                                                                                                          |                                                           |                                                                                                                                                                                                                                                                                                                              |
|----------------------------------|--------------------------------------------------------------------|------------------------------------------------------------|--------------------------------------------------------------------------------------------------------------------------------------------------------------------------------------------------------------------------------------------------------------------------------------------------------------------------|-----------------------------------------------------------|------------------------------------------------------------------------------------------------------------------------------------------------------------------------------------------------------------------------------------------------------------------------------------------------------------------------------|
| Feeney et al, <sup>22</sup> 2019 | 7-day readmission after discharge from oncologic surgery           | Generalized linear mixed model with Bernoulli distribution | Age, gender, race, insurance type, income, DM, obesity, psychiatric illness, alcohol abuse, HTN, cancer with metastasis, chronic lung disease, peripheral vascular disease, renal failure, number of comorbidities/procedures, risk class, country of residence, cancer, weekend admission, admission hour, and hospital | Adjusted OR for 7-day readmission (Spanish/EP OR NENS/EP) | No difference in readmission: LEP (Spanish) vs. EP, aOR 1.29 (0.93-1.80); LEP (NENS) vs. EP, aOR 0.80 (0.54-1.18)                                                                                                                                                                                                            |
| Feeney et al, <sup>23</sup> 2019 | 7-day readmission after discharge from emergency surgery admission | Generalized linear mixed model with Bernoulli distribution | Age, gender, race, insurance status, income, Elixhauser comorbidity score, number of comorbidities/procedures, risk class, country of residence, cancer, weekend admission, admission hour                                                                                                                               | Adjusted OR for 7-day readmission (Spanish/EP OR NENS/EP) | No difference in readmission: Appendectomy, LEP (Spanish) vs. EP, aOR 0.65 (0.41-1.04), LEP (NENS) vs. EP, aOR 1.13 (0.63-2.03); cholecystectomy, LEP (Spanish) vs. EP, aOR 1.02 (0.74-1.42), LEP (NENS) vs. EP, aOR 0.85 (0.50-1.45); adhesiolysis, LEP (Spanish) vs. EP, aOR 0.73 (0.39-1.36), LEP (NENS) vs. EP, aOR 0.77 |

|                                  |                                                                            |                                         |                                                                                                                                                                                                     |                                                 |                                                                                                                        |   |
|----------------------------------|----------------------------------------------------------------------------|-----------------------------------------|-----------------------------------------------------------------------------------------------------------------------------------------------------------------------------------------------------|-------------------------------------------------|------------------------------------------------------------------------------------------------------------------------|---|
|                                  |                                                                            |                                         |                                                                                                                                                                                                     |                                                 | (0.32-1.86); high-risk procedures, LEP (Spanish) vs. EP, aOR 1.45 (0.89-2.35), LEP (NENS) vs. EP, aOR 1.56 (0.94-2.59) |   |
| Feeney et al, <sup>24</sup> 2020 | 30-day revisit to emergency department after discharge from cancer surgery | Multivariable logistic regression model | Age, gender, race/ethnicity, insurance status, risk score, income, BMI, emergency classification, Elixhauser comorbidity score, ASA class, LOS                                                      | Adjusted OR for 30-day revisit (LEP/EP)         | No difference in 30-day revisits: aOR 1.08 (0.75-1.53)                                                                 | . |
| Wong et al, <sup>33</sup> 2021   | Postoperative emergency department visit within 30 days of discharge       | Multinomial logistic regression         | Age, race, gender, BMI, diagnosis, stoma, surgical approach, ASA status, frailty index, postoperative LOS, unexpected return to OR, discharge disposition, antibiotics on discharge, insurance type | Adjusted RR for 30-day emergency visit (LEP/EP) | LEP associated with increase in ED visits: aRR 2.7 (1.3-5.3); preventable visit, aRR 3.6 (1.7-7.9)                     | ↑ |

|                                        |                                                                                                                                    |                                         |                                                                                                                       |                                                                                          |                                                                                                                                                                             |    |
|----------------------------------------|------------------------------------------------------------------------------------------------------------------------------------|-----------------------------------------|-----------------------------------------------------------------------------------------------------------------------|------------------------------------------------------------------------------------------|-----------------------------------------------------------------------------------------------------------------------------------------------------------------------------|----|
| Manuel et al, <sup>27</sup> 2022       | 30-day readmission after total knee and hip arthroplasty                                                                           | Multivariable logistic regression model | Age, sex, race/ethnicity, insurance type, ASA status, BMI, surgical case class, case length, and estimated blood loss | Adjusted OR for 30-day readmission (LEP/EP)                                              | No difference in readmission rates: aOR 0.80 (0.49-1.28)                                                                                                                    | .  |
| Manuel et al, <sup>28</sup> 2022       | 30-day readmission after craniotomy                                                                                                | Multivariable logistic regression model | Age, sex, race/ethnicity, insurance type, ASA status, and surgical case class                                         | Adjusted OR for 30-day readmission (LEP/EP)                                              | No difference in readmission rates: aOR 0.84 (0.45-1.56)                                                                                                                    | .  |
| Stolarski et al, <sup>29</sup> 2022    | 30-day readmission, 1-year readmission, 1-year emergency department visits after laparoscopic sleeve gastrectomy or gastric bypass | Multivariable logistic regression model | Age, sex, race, insurance status, ASA class, smoking status, year of operation, and procedure type                    | Adjusted OR for 30 day-readmission, 1-year readmission, and 1-year ED revisits, (LEP/EP) | No difference in 30-day readmission, aOR 1.01 (0.58-1.71); No difference in 1-year readmission, aOR 0.94 (0.56-1.55); Fewer 1-year ED revisits in LEP, aOR 0.65 (0.43-0.95) | .↓ |
| <b>Long-term Mortality or Survival</b> |                                                                                                                                    |                                         |                                                                                                                       |                                                                                          |                                                                                                                                                                             |    |
| Nashed et al, <sup>15</sup> 2012       | Overall survival from time of initial diagnostic surgery to date of death                                                          | Log rank test of equality               | None                                                                                                                  | Difference in time-to-event between LEP & EP                                             | No difference in overall survival (p-value = 0.40)                                                                                                                          | .  |



|                                  |                                                                                                                              |                                                        |                                                                                                                                               |                                              |                                                                                                                                                                                                          |    |
|----------------------------------|------------------------------------------------------------------------------------------------------------------------------|--------------------------------------------------------|-----------------------------------------------------------------------------------------------------------------------------------------------|----------------------------------------------|----------------------------------------------------------------------------------------------------------------------------------------------------------------------------------------------------------|----|
| Hyun et al, <sup>21</sup> 2017   | Death from admission to 18-month follow-up after admission for ACS event                                                     | Multivariable logistic regression model                | Gender, GRACE risk score, previous cardiac diagnosis and procedures, presenting diagnosis, medications, PCI, CABG, referral to rehabilitation | Adjusted OR for long-term mortality (LEP/EP) | No difference in mortality: aOR 1.08 (0.75-1.58)                                                                                                                                                         | .  |
| Sridhar et al, <sup>9</sup> 2019 | Overall survival after curative pancreatic cancer surgery                                                                    | Log rank test of equality                              | None                                                                                                                                          | Difference in time-to-event between LEP & EP | No difference between LEP and EP in median overall survival from Stage I-II cancer, (p-value=0.778); Stage III-IV cancer, longer median overall survival for LEP than EP (8 vs. 5 months; p-value=0.039) | .↑ |
| Feeney et al, <sup>24</sup> 2020 | Time to all-cause mortality from surgical oncology procedure                                                                 | Multivariable Cox proportional hazard regression model | Age, race/ethnicity, insurance status, risk score, emergency classification, and Elixhauser comorbidity score                                 | Adjusted HR for all-cause mortality (LEP/EP) | No difference in mortality: aHR 0.87 (0.52-1.45)                                                                                                                                                         | .  |
| Asokan et al, <sup>10</sup> 2020 | Overall survival defined as time from esophageal cancer diagnosis to death censored to last follow-up (in operable patients) | Log rank test of equality                              | None                                                                                                                                          | Difference in time-to-event between LEP & EP | No difference between LEP and EP in overall survival (p-value=0.718)                                                                                                                                     | .  |

Abbreviations: AAA, Abdominal aortic aneurysm; ACS, Acute coronary syndrome; aHR, Adjusted hazard ratio; aIRR, Adjusted incidence rate ratio; aMR, Adjusted means ratio; aOR, Adjusted odds ratio; aRR, Adjusted relative risk; ASA, American Society of Anesthesiologists; BMI, Body mass index; CSICU, Cardiovascular surgical intensive care unit; COPD, Chronic obstructive pulmonary disease; CI, Confidence interval; CHF, Congestive heart failure; CABG, Coronary artery bypass surgery; CAD, Coronary artery disease; DM, Diabetes

mellitus; EEG, Electroencephalogram; EPP, Electronic patient portal; ED, Emergency department; EP, English Proficiency; EQ-VAS, EuroQol Group visual analogue scale; EWL, Excess weight loss; GRACE, Global Registry of Acute Coronary Syndrome; HR, Hazard ratio; HTN, Hypertension; IRR, Incidence rate ratio; IKS, International Knee Society; JSN, Joint space narrowing; KL, Kellgren Lawrence classification; LOS, Length of stay; LEP, Limited English proficiency; LEP-I, Limited English proficiency with interpreter required; LEP-N, Limited English proficiency with no interpreter required; MACE, Major adverse cardiovascular events; MIGS, Minimally invasive gynecologic surgery; N/S, non-specified; NSQIP, National Surgical Quality Improvement Program; NENS, Non-English/non-Spanish; OR, Odds ratio; OME, Oral morphine equivalent; OHS, Oxford hip score; PCI, Percutaneous coronary intervention; RR, Relative risk; SES, Socioeconomic status; THA, Total hip arthroplasty; TKA, Total knee arthroplasty.

**eTable 2. Decision for Inclusion and Exclusion**

| Source                                   | Included or Excluded | Reason for Exclusion               | Note                                                                                                                                                                                                  |
|------------------------------------------|----------------------|------------------------------------|-------------------------------------------------------------------------------------------------------------------------------------------------------------------------------------------------------|
| <b>Results of full-text study review</b> |                      |                                    |                                                                                                                                                                                                       |
| Danilowicz et al, <sup>34</sup> 1971     | Excluded             | Wrong population                   | The study included pediatric patients.                                                                                                                                                                |
| Dzioba et al, <sup>35</sup> 1984         | Excluded             | Wrong predictors                   | LEP was not a prespecified primary/secondary predictor or a part of a prediction set.                                                                                                                 |
| Doxey et al, <sup>36</sup> 1988          | Excluded             | Wrong predictors                   | LEP was defined as 4-level score                                                                                                                                                                      |
| Naylor et al, <sup>37</sup> 1993         | Excluded             | Wrong predictors                   | LEP was not a prespecified primary/secondary predictor or a part of a prediction set.                                                                                                                 |
| John-Baptiste et al, <sup>38</sup> 2004  | Included             |                                    |                                                                                                                                                                                                       |
| Ernest et al, <sup>39</sup> 2007         | Excluded             | Wrong outcomes                     | Primary outcome was cognitive function before surgery.                                                                                                                                                |
| Bandyopadhyay et al, <sup>40</sup> 2007  | Excluded             | Wrong predictors                   | English speaking or non-speaking cultural background was one of the predictors described in the study but not LEP.                                                                                    |
| Clapp et al, <sup>41</sup> 2007          | Excluded             | Wrong study design                 | Qualitative and descriptive study.                                                                                                                                                                    |
| Hawley et al, <sup>42</sup> 2008         | Excluded             | Wrong predictors<br>Wrong outcomes | Race and ethnicity were primary predictors of the study. EP was used to only subcategorize Hispanic population into EP Hispanic and LEP Hispanic group. The study looked at decision making processes |
| Maly et al, <sup>43</sup> 2009           | Excluded             | Wrong predictors                   | LEP was not a prespecified primary/secondary predictor or a part of a prediction set.                                                                                                                 |
| Dowsey et al, <sup>44</sup> 2009         | Included             |                                    |                                                                                                                                                                                                       |
| Halpern et al, <sup>45</sup> 2009        | Excluded             | Conference abstract                |                                                                                                                                                                                                       |
| Nielsen et al, <sup>46</sup> 2010        | Excluded             | Wrong predictors                   | LEP was not a prespecified primary/secondary predictor or a part of a prediction set. Primary predictors were nativity and race/ethnicity.                                                            |
| MacDonald et al, <sup>5</sup> 2010       | Included             |                                    |                                                                                                                                                                                                       |

| Source                              | Included or Excluded | Reason for Exclusion                                     | Note                                                                                                                                                                                                                                 |
|-------------------------------------|----------------------|----------------------------------------------------------|--------------------------------------------------------------------------------------------------------------------------------------------------------------------------------------------------------------------------------------|
| Clark et al, <sup>47</sup> 2011     | Excluded             | Wrong predictors<br>Wrong outcomes                       | LEP was not a prespecified primary/secondary predictor or a part of a prediction set. Primary predictor was differential consent tool. Primary outcome was questionnaire on understanding of surgery reflecting efficacy of consent. |
| Campesino et al, <sup>48</sup> 2012 | Excluded             | Wrong predictors<br>Wrong outcomes<br>Wrong study design | LEP was not a prespecified primary/secondary predictor or a part of a prediction set. The study looked at decision making processes. Qualitative and descriptive study design with mixed methods.                                    |
| Nashed et al, <sup>15</sup> 2012    | Included             |                                                          |                                                                                                                                                                                                                                      |
| Alnaes et al, <sup>49</sup> 2012    | Excluded             | Wrong study design                                       | Qualitative case report.                                                                                                                                                                                                             |
| Betjemann et al, <sup>50</sup> 2013 | Included             |                                                          |                                                                                                                                                                                                                                      |
| Dowsey et al, <sup>51</sup> 2014    | Excluded             | Wrong predictors                                         | LEP was not a prespecified primary/secondary predictor or a part of a prediction set. Primary predictor was SES, and LEP was just one of the adjusted covariates                                                                     |
| Ankuda et al, <sup>52</sup> 2014    | Excluded             | Wrong predictors<br>Wrong outcomes                       | LEP was not a prespecified primary/secondary predictor or a part of a prediction set. The study looked at decision making processes and advance directives.                                                                          |
| Thompson et al, <sup>16</sup> 2014  | Included             |                                                          |                                                                                                                                                                                                                                      |
| Lopez et al, <sup>53</sup> 2014     | Excluded             | Wrong outcomes<br>Wrong population                       | Primary outcome was satisfaction in decision making. Study subjects were recruited from cancer registry, not necessarily a surgical setting.                                                                                         |
| Alley et al, <sup>54</sup> 2016     | Excluded             | Wrong predictors                                         | LEP was not a prespecified primary/secondary predictor or a part of a prediction set. Primary predictor was Chinese ethnicity.                                                                                                       |
| Tang et al, <sup>19</sup> 2016      | Included             |                                                          |                                                                                                                                                                                                                                      |
| Patel et al, <sup>55</sup> 2016     | Excluded             | Wrong predictors                                         | Primary predictor was surgeon's LEP status.                                                                                                                                                                                          |

| Source                               | Included or Excluded | Reason for Exclusion | Note                                                                                                                                                                                 |
|--------------------------------------|----------------------|----------------------|--------------------------------------------------------------------------------------------------------------------------------------------------------------------------------------|
| Wilbur et al, <sup>6</sup> 2016      | Included             |                      |                                                                                                                                                                                      |
| Inagaki et al, <sup>56</sup> 2016    | Excluded             | Conference abstract  |                                                                                                                                                                                      |
| Spence et al, <sup>57</sup> 2017     | Excluded             | Conference abstract  |                                                                                                                                                                                      |
| Talamantes et al, <sup>58</sup> 2017 | Excluded             | Wrong predictors     | LEP was not a prespecified primary/secondary predictor or a part of a prediction set. Primary predictor was zip code with differential proportion of linguistic isolation household. |
| Inagaki et al, <sup>20</sup> 2017    | Included             |                      |                                                                                                                                                                                      |
| Hyun et al, <sup>21</sup> 2017       | Included             |                      |                                                                                                                                                                                      |
| Jaiswal et al, <sup>59</sup> 2018    | Included             |                      |                                                                                                                                                                                      |
| Yoo et al, <sup>60</sup> 2018        | Excluded             | Wrong outcomes       | Primary outcome was irrigation compliance after surgery                                                                                                                              |
| Talutis et al, <sup>61</sup> 2018    | Excluded             | Conference abstract  |                                                                                                                                                                                      |
| ShiraeV et al, <sup>62</sup> 2018    | Excluded             | Wrong outcomes       | Primary outcome was follow-up compliance after surgery                                                                                                                               |
| Feeney et al, <sup>23</sup> 2019     | Included             |                      |                                                                                                                                                                                      |
| Patel et al, <sup>63</sup> 2019      | Excluded             | Wrong predictors     | LEP was not a prespecified primary/secondary predictor or a part of a prediction set. Primary predictor was hospital type.                                                           |
| Sridhar et al, <sup>9</sup> 2019     | Included             |                      |                                                                                                                                                                                      |
| Feeney et al, <sup>64</sup> 2019     | Included             |                      |                                                                                                                                                                                      |
| Rosenbloom et al, <sup>65</sup> 2019 | Excluded             | Wrong predictors     | Primary predictor was health care provider's LEP status.                                                                                                                             |
| Schultz et al, <sup>66</sup> 2020    | Excluded             | Conference abstract  |                                                                                                                                                                                      |
| Feeney et al, <sup>24</sup> 2020     | Included             |                      |                                                                                                                                                                                      |
| Cataneo et al, <sup>67</sup> 2020    | Excluded             | Conference abstract  |                                                                                                                                                                                      |
| Asokan et al, <sup>10</sup> 2020     | Included             |                      |                                                                                                                                                                                      |
| Bernstein et al, <sup>25</sup> 2020  | Included             |                      |                                                                                                                                                                                      |
| Varady et al, <sup>12</sup> 2020     | Included             |                      |                                                                                                                                                                                      |
| Hong et al, <sup>68</sup> 2021       | Excluded             | Conference abstract  |                                                                                                                                                                                      |
| Burgoon et al, <sup>69</sup> 2021    | Excluded             | Wrong study design   | Qualitative and descriptive study.                                                                                                                                                   |
| Wong et al, <sup>33</sup> 2021       | Included             |                      |                                                                                                                                                                                      |
| Witt et al, <sup>70</sup> 2021       | Included             |                      |                                                                                                                                                                                      |

| Source                                 | Included or Excluded | Reason for Exclusion                 | Note                                                                                                                                                                                                                           |
|----------------------------------------|----------------------|--------------------------------------|--------------------------------------------------------------------------------------------------------------------------------------------------------------------------------------------------------------------------------|
| Greenberg et al, <sup>71</sup> 2021    | Excluded             | Wrong predictors                     | LEP was not a prespecified primary/secondary predictor or a part of a prediction set. Primary predictor was hospital type.                                                                                                     |
| Schwartz et al, <sup>31</sup> 2021     | Included             |                                      |                                                                                                                                                                                                                                |
| Witt et al, <sup>13</sup> 2021         | Included             |                                      |                                                                                                                                                                                                                                |
| Maurer et al, <sup>14</sup> 2021       | Included             |                                      |                                                                                                                                                                                                                                |
| Shehan et al, <sup>72</sup> 2022       | Excluded             | Wrong outcomes                       | Primary outcomes were treatment adherence and decision making.                                                                                                                                                                 |
| Tang et al, <sup>73</sup> 2022         | Excluded             | Wrong outcomes                       | Primary outcome was time to adjuvant chemotherapy. No estimates, 95% CIs, and p-values were reported pertaining to association between LEP and time to surgery.                                                                |
| de Crescenzo et al, <sup>74</sup> 2022 | Excluded             | Wrong predictors<br>Wrong population | LEP was not a prespecified primary/secondary predictor or a part of a prediction set. Primary predictor was frequency of interpreting service use. Study population consisted of only those who required interpreting service. |
| Norris et al, <sup>75</sup> 2022       | Excluded             | Wrong predictors<br>Wrong outcomes   | LEP was not a prespecified primary/secondary predictor or a part of a prediction set. Primary outcome was frequency of social needs.                                                                                           |
| Manuel et al, <sup>28</sup> 2022       | Included             |                                      |                                                                                                                                                                                                                                |
| Aggarwal et al, <sup>7</sup> 2022      | Included             |                                      |                                                                                                                                                                                                                                |
| Silverstein et al, <sup>8</sup> 2022   | Included             |                                      |                                                                                                                                                                                                                                |
| Khan et al, <sup>76</sup> 2022         | Excluded             | Conference abstract                  |                                                                                                                                                                                                                                |
| Manuel et al, <sup>27</sup> 2022       | Included             |                                      |                                                                                                                                                                                                                                |
| Stolarski et al, <sup>29</sup> 2022    | Included             |                                      |                                                                                                                                                                                                                                |
| Kovoor et al, <sup>30</sup> 2022       | Included             |                                      |                                                                                                                                                                                                                                |
| Dirix et al, <sup>77</sup> 2022        | Excluded             | Wrong predictors                     | Primary predictor was language barrier in Belgium                                                                                                                                                                              |
| Barnard et al, <sup>78</sup> 2022      | Excluded             | Wrong predictors                     | LEP was not a prespecified primary/secondary predictor or a part of a prediction set.                                                                                                                                          |

| Source                                                                | Included or Excluded | Reason for Exclusion               | Note                                                                                                                           |
|-----------------------------------------------------------------------|----------------------|------------------------------------|--------------------------------------------------------------------------------------------------------------------------------|
| Plocienniczak et al, <sup>79</sup> 2022                               | Excluded             | Wrong population                   | The study included pediatric patients.                                                                                         |
| Alwani et al, <sup>80</sup> 2022                                      | Excluded             | Wrong outcomes<br>Wrong population | Primary outcome was frequency and length of follow-up care. Study population was not necessarily from a postoperative setting. |
| <b>Results of additional studies from relevant systematic reviews</b> |                      |                                    |                                                                                                                                |
| Jimenez et al, <sup>81</sup> 2014                                     | Excluded             | Wrong population                   | The study included pediatric patients.                                                                                         |
| Dai et al, <sup>82</sup> 2021                                         | Excluded             | Wrong population                   | The study included pediatric patients.                                                                                         |
| Essex et al, <sup>83</sup> 2021                                       | Excluded             | Wrong population                   | The setting was neither surgery nor anesthesiologic procedure                                                                  |
| Greene et al, <sup>84</sup> 2019                                      | Excluded             | Wrong outcome                      | Primary outcome was access to initial appointment in orthopedic care, not necessarily implying access to surgical care         |
| Jaramillo et al, <sup>85</sup> 2016                                   | Excluded             | Wrong population                   | The study included pediatric patients.                                                                                         |
| Lee et al, <sup>86</sup> 2017                                         | Excluded             | Wrong predictors                   | Primary predictor was interpreter intervention among patients with LEP.                                                        |
| Malevanchik et al, <sup>87</sup> 2021                                 | Excluded             | Wrong population                   | The study population was patients discharged from hospital, not necessarily surgical patients.                                 |
| Plancarte et al, <sup>88</sup> 2021                                   | Excluded             | Wrong population                   | The study included pediatric patients.                                                                                         |
| Qureshi et al, <sup>89</sup> 2014                                     | Excluded             | Wrong population                   | The study population was patients treated with radiotherapy.                                                                   |

Abbreviations: CI, Confidence interval; EP, English Proficiency; LEP, Limited English proficiency.

**eTable 3. Unadjusted Results**

| Source                              | Definition of Outcome                                                                                             | Statistical Methodology                          | Measure of Association                                                | Magnitude and Direction of Associations Between LEP (vs. EP) and Outcome Measures                                                               |
|-------------------------------------|-------------------------------------------------------------------------------------------------------------------|--------------------------------------------------|-----------------------------------------------------------------------|-------------------------------------------------------------------------------------------------------------------------------------------------|
| <b>Access to Surgery</b>            |                                                                                                                   |                                                  |                                                                       |                                                                                                                                                 |
| Betjemann et al, <sup>50</sup> 2013 | Underwent anterior temporal lobectomy after screening confirmed refractory epilepsy and mesial temporal sclerosis | Pearson's chi-square test                        | Independence between LEP status and opting into operation             | LEP and receipt of surgery were associated (p-value = 0.01)                                                                                     |
| Sridhar et al, <sup>9</sup> 2019    | Receipt of curative pancreatic cancer surgery                                                                     | Pearson's chi-square test                        | Independence between LEP status and receipt of surgery                | LEP and receipt of surgery were independent (p-value = 0.79)                                                                                    |
| Asokan et al, <sup>10</sup> 2020    | Receipt of esophagectomy in patients with operable stage                                                          | Pearson's chi-square test or Fisher's exact test | Independence between LEP status and receipt of surgery                | LEP and receipt of surgery were independent (p-value = 0.103)                                                                                   |
| Witt et al, <sup>70</sup> 2021      | Routine admission vs. Emergent/urgent admission for neuro-oncologic surgery                                       | Pearson's chi-square test                        | Independence between LEP status and rate of emergent/urgent admission | LEP and rate of emergent or urgent admission were associated (p-value < 0.001): The rates were 75.4% for NENS, 61.0% for SPL, and 58.9% for EPL |
| Maurer et al, <sup>14</sup> 2021    | Elective vs. emergent/urgent admission for colectomy                                                              | Pearson's chi-square test                        | Independence between LEP status and rate of emergent/urgent admission | LEP and rate of emergency admission were associated (60.3% vs. 48.6%; p-value < 0.001)                                                          |



| Source                               | Definition of Outcome                                                                                                        | Statistical Methodology                             | Measure of Association                                              | Magnitude and Direction of Associations Between LEP (vs. EP) and Outcome Measures                                                                                                                                                                                                                                      |
|--------------------------------------|------------------------------------------------------------------------------------------------------------------------------|-----------------------------------------------------|---------------------------------------------------------------------|------------------------------------------------------------------------------------------------------------------------------------------------------------------------------------------------------------------------------------------------------------------------------------------------------------------------|
| <b>Delay in Surgical Care</b>        |                                                                                                                              |                                                     |                                                                     |                                                                                                                                                                                                                                                                                                                        |
| Nashed et al, <sup>15</sup> 2012     | Time from diagnosis to craniotomy                                                                                            | Log rank test of equality                           | Difference in time-to-event between LEP & EP                        | No difference in time to surgery (p-value = 0.26).                                                                                                                                                                                                                                                                     |
| Thompson et al, <sup>16</sup> 2014   | Time from presurgical evaluation to anterior temporal lobectomy                                                              | Log rank test of equality                           | Difference in time-to event between LEP & EP                        | Patients with LEP had Longer time to surgery than those with EP (p-value = 0.0085)                                                                                                                                                                                                                                     |
|                                      |                                                                                                                              | Univariate cox proportional hazard regression model | Unadjusted HR for surgery (LEP/EP)                                  | Patients with LEP had longer times to surgery than those with EP: HR 0.56 (95% CI 0.36-0.87)                                                                                                                                                                                                                           |
| Jaiswal et al, <sup>59</sup> 2018    | Time from breast cancer diagnosis to initial treatment (delayed treatment $\geq$ 37 days; timely treatment <37 days)         | Bivariate logistic regression model                 | Unadjusted OR for delayed treatment (LEP/EP)                        | LEP associated with longer time to treatment: OR 5.0 (95% CI N/S; p-value=0.0045)                                                                                                                                                                                                                                      |
| Silverstein et al, <sup>8</sup> 2022 | Time from date of referral to first appointment with a MIGS provider (delayed interval > 30 days; timely interval < 30 days) | Pearson's chi-square test or Fisher's exact test    | Independence between LEP status and timely interval for appointment | LEP and timely interval were associated in the pandemic cohort (p-value < 0.01): The rates of having timely interval were 45.7%% for LEP and 71.6% for EP; LEP and timely interval were independent in the historic cohort (p-value = 0.84): The rates of having timely interval were 38.7%% for LEP and 40.5% for EP. |
| <b>Length of Stay</b>                |                                                                                                                              |                                                     |                                                                     |                                                                                                                                                                                                                                                                                                                        |
| MacDonald et al, <sup>5</sup> 2010   | LOS (long LOS, 7>days; short LOS, 6<days) after hip and knee arthroplasty                                                    | Pearson's chi-square test                           | Independence between LEP status and long LOS                        | LEP and proportion of long LOS were associated (p-value < 0.05).                                                                                                                                                                                                                                                       |

| Source                            | Definition of Outcome                                                                                                                                   | Statistical Methodology                                      | Measure of Association                                       | Magnitude and Direction of Associations Between LEP (vs. EP) and Outcome Measures                                                                                                         |
|-----------------------------------|---------------------------------------------------------------------------------------------------------------------------------------------------------|--------------------------------------------------------------|--------------------------------------------------------------|-------------------------------------------------------------------------------------------------------------------------------------------------------------------------------------------|
| Tang et al, <sup>19</sup> 2016    | LOS defined as time from CSICU admission to hospital discharge after CABG. LOS was categorized into quartiles (1-5 days, 6 days, 7-8 days, and >9 days) | Multivariate polynomial regression model                     | Unadjusted OR for each quartile of LOS (LEP/EP)              | Increased or no difference in LOS: LOS 6 days vs LOS 1-5 days OR 1.78 (0.96-3.29); LOS 7-8 days vs. LOS 1-5 days OR 1.59 (0.87-2.91); LOS $\geq$ 9 days vs. 1-5 days OR 2.17 (1.21-3.91). |
| Inagaki et al, <sup>20</sup> 2017 | Postoperative LOS after infrainguinal bypass surgery                                                                                                    | Unpaired t-test                                              | Difference in mean LOS between LEP & EP                      | No difference in LOS between LEP and EP (11.2 days vs. 9.4 days; p-value = 0.202).                                                                                                        |
| Hyun et al, <sup>21</sup> 2017    | LOS in days after admission with suspected ACS event                                                                                                    | Wilcoxon rank-sum test                                       | Difference in median LOS between LEP & EP                    | Longer LOS for those with LEP than EP (3.1 vs. 2.5 days; p-value = 0.001).                                                                                                                |
| Feeney et al, <sup>64</sup> 2019  | LOS in days after oncologic surgery                                                                                                                     | Generalized linear model with negative binomial distribution | Unadjusted IRR for LOS (Spanish/EP OR NENS/EP)               | Increased LOS for NENS: LEP (Spanish) vs. EP, IRR 1.04 (0.99-1.10); LEP (NENS) vs. EP, IRR 1.06 (1.01-1.12).                                                                              |
| Feeney et al, <sup>23</sup> 2019  | LOS during hospitalization for emergency surgery                                                                                                        | Generalized linear model with negative binomial distribution | Unadjusted IRR for LOS (Spanish/EP OR NENS/EP)               | Spanish speakers had reduced LOS: LEP (Spanish) vs. EP, IRR 0.72 (0.71-0.74), LEP (NENS) vs. EP, IRR 0.96 (0.93-0.98)                                                                     |
| Feeney et al, <sup>24</sup> 2020  | LOS in days                                                                                                                                             | Kruskal Wallis rank-sum test                                 | Difference in median LOS between LEP & EP                    | No difference in median LOS between LEP and EP (1.5 vs. 1.5; p-value = 0.68).                                                                                                             |
| Witt et al, <sup>70</sup> 2021    | Total LOS after neuro-oncologic surgery                                                                                                                 | Bivariate negative binomial regression model                 | Unadjusted IRR for LOS (Spanish/EP OR NENS/EP)               | Increased LOS for NENS: LEP (Spanish) vs. EP, IRR 1.05 (0.97-1.13); LEP (NENS) vs. EP, IRR 1.29 (1.19-1.39)                                                                               |
|                                   | Postoperative LOS after neuro-oncologic surgery                                                                                                         |                                                              | Unadjusted IRR for postoperative LOS (Spanish/EP OR NENS/EP) | Increased postop LOS for NENS: LEP (Spanish) vs. EP, IRR 1.01 (0.93-1.09); LEP (NENS) vs. EP, IRR 1.32 (1.23-1.44)                                                                        |
| Manuel et al, <sup>27</sup> 2022  | Total LOS after total knee and hip arthroplasty                                                                                                         | Wilcoxon rank-sum test                                       | Difference in median LOS between LEP & EP                    | Longer median LOS in patient with LEP than EP (p-value < 0.001)                                                                                                                           |

| Source                              | Definition of Outcome                                                                     | Statistical Methodology                              | Measure of Association                                                        | Magnitude and Direction of Associations Between LEP (vs. EP) and Outcome Measures                                                                                      |
|-------------------------------------|-------------------------------------------------------------------------------------------|------------------------------------------------------|-------------------------------------------------------------------------------|------------------------------------------------------------------------------------------------------------------------------------------------------------------------|
| Manuel et al, <sup>28</sup> 2022    | Total LOS after craniotomy                                                                | Bivariate negative binomial regression model         | Unadjusted IRR for LOS (LEP/EP)                                               | Longer LOS for LEP: IRR 1.41 (1.26-1.58)                                                                                                                               |
| Stolarski et al, <sup>29</sup> 2022 | LOS from index operation (laparoscopic sleeve gastrectomy or gastric bypass)              | Wilcoxon rank-sum test                               | Difference in median LOS between LEP & EP                                     | No difference in median LOS between LEP and EP (2.26 days vs. 2.12 days; p-value = 0.60).                                                                              |
| <b>Discharge Disposition</b>        |                                                                                           |                                                      |                                                                               |                                                                                                                                                                        |
| Witt et al, <sup>70</sup> 2021      | Discharge disposition to rehabilitation (vs. home) after neuro-oncologic surgery          | Pearson's chi-square test                            | Independence between LEP status and discharge disposition to home             | LEP and proportion of discharge disposition to home were associated (p-value < 0.001): The proportions were 72.4% for LEP (Spanish), 57.6% for NENS, and 60.0% for EP. |
| Manuel et al, <sup>27</sup> 2022    | Discharge disposition to skilled facility (vs. home) after total knee or hip arthroplasty | Pearson's chi-square test                            | Independence between LEP status and discharge disposition to skilled facility | LEP and discharge dispositions to skilled facility were associated (42.6% vs. 20.5%; p-value < 0.001)                                                                  |
| Manuel et al, <sup>28</sup> 2022    | Discharge disposition to skilled facility (vs. home) after craniotomy                     | Bivariate logistic regression model                  | Unadjusted OR for skilled facility discharge (LEP/EP)                         | Increased discharge to skilled facility for LEP: OR 2.26 (1.60-3.20)                                                                                                   |
| <b>In-hospital Mortality</b>        |                                                                                           |                                                      |                                                                               |                                                                                                                                                                        |
| Hyun et al, <sup>21</sup> 2017      | In-hospital death during admission for suspected ACS event                                | Pearson's chi-square test                            | Independence between LEP status and in-hospital death                         | LEP and in-hospital mortality were associated (4.4% vs. 1.7%; p-value = 0.001).                                                                                        |
| Feeney et al, <sup>64</sup> 2019    | In-hospital all-cause mortality after oncologic surgery                                   | Generalized linear model with Bernoulli distribution | Unadjusted OR for in-hospital death (Spanish/EP OR NENS/EP)                   | No difference in mortality: LEP (Spanish) vs. EP, OR 0.73 (0.49-1.08); LEP (NENS) vs. EP, OR 1.30 (0.94-1.76).                                                         |

| Source                            | Definition of Outcome                                                                                          | Statistical Methodology                              | Measure of Association                                              | Magnitude and Direction of Associations Between LEP (vs. EP) and Outcome Measures                                   |
|-----------------------------------|----------------------------------------------------------------------------------------------------------------|------------------------------------------------------|---------------------------------------------------------------------|---------------------------------------------------------------------------------------------------------------------|
| Feeney et al, <sup>23</sup> 2019  | In-hospital all-cause mortality after emergency surgery                                                        | Generalized linear model with Bernoulli distribution | Unadjusted OR for in-hospital death (Spanish/EP OR NENS/EP)         | Reduced or no difference in LOS: LEP (Spanish) vs. EP, OR 0.33 (0.26-0.43), LEP (NENS) vs. EP, OR 0.92 (0.74-1.13). |
| Witt et al, <sup>70</sup> 2021    | In-hospital mortality after neuro-oncologic surgery                                                            | Pearson's chi-square test                            | Difference in in-hospital mortality across LEP statuses             | No difference across LEP statuses in in-hospital mortality (p-value =0.127)                                         |
| <b>Complication</b>               |                                                                                                                |                                                      |                                                                     |                                                                                                                     |
| Inagaki et al, <sup>20</sup> 2017 | 30-day wound infections, 30-day adverse graft event after infrainguinal bypass surgery                         | Pearson's chi-square test                            | Independence between LEP status and 30-day wound infections         | LEP and wound infections are independent (31.4% vs. 35.7%; p-value = 0.415)                                         |
|                                   |                                                                                                                |                                                      | Independence between LEP status and 30-day adverse graft events     | LEP and adverse graft events were independent (31.4% vs. 29.0%; p-value = 0.744)                                    |
| Hyun et al, <sup>21</sup> 2017    | In-hospital MACE; Delayed <18 months MACE after admission for ACS event                                        | Pearson's chi-square test                            | Independence between LEP status and in-hospital MACE                | LEP and in-hospital MACE were associated (24.2% vs. 14.9%; p-value < 0.001)                                         |
|                                   |                                                                                                                |                                                      | Independence between LEP status and 18-month MACE                   | LEP and 18-month MACE were independent (22.5% vs. 20.7%; p-value = 0.59)                                            |
| Feeney et al, <sup>24</sup> 2020  | In-hospital major complications after cancer surgery based on NSQIP risk calculator major morbidity definition | Pearson's chi-square test                            | Independence between LEP status and in-hospital major complications | LEP and major complications were independent (2.3% vs. 3.3%; p-value = 0.19).                                       |

| Source                              | Definition of Outcome                                                                                  | Statistical Methodology             | Measure of Association                                                                  | Magnitude and Direction of Associations Between LEP (vs. EP) and Outcome Measures                                                                                            |
|-------------------------------------|--------------------------------------------------------------------------------------------------------|-------------------------------------|-----------------------------------------------------------------------------------------|------------------------------------------------------------------------------------------------------------------------------------------------------------------------------|
| Witt et al, <sup>70</sup> 2021      | Presence of inpatient complications validated for supratentorial tumors                                | Pearson's chi-square test           | Independence between LEP status and inpatient complications                             | LEP and proportion of inpatient complications were associated (p-value < 0.001): The proportions were 16.2% for LEP (Spanish), 28.8% for NENS, and 19.0% for EP.             |
| Stolarski et al, <sup>29</sup> 2022 | Presence of 30-day complications after laparoscopic sleeve gastrectomy or gastric bypass               | Pearson's chi-square test           | Independence between LEP status and 30-day complications                                | LEP and 30-day complications were independent (2.0% vs. 1.0%; p-value = 0.08)                                                                                                |
| <b>Pain Management</b>              |                                                                                                        |                                     |                                                                                         |                                                                                                                                                                              |
| Schwartz, et al, <sup>31</sup> 2021 | Total oral morphine equivalent (OME) prescribed at discharge after admission to trauma surgery service | Bivariate logistic regression model | Unadjusted OR for receiving discharge opioids (LEP/EP)                                  | LEP less likely to receive discharge opioid prescription: OR 0.56 (0.42-0.75)                                                                                                |
|                                     | Total amount of opioids prescribed at discharge after admission to trauma surgery service              | Bivariate quantile regression model | Difference in mean total OME between LEP & EP                                           | LEP patients received 75.0 (43.5-106.6) fewer OME than EP patients at 60th percentile; LEP patients received 75.0 (33.8-116.2) fewer OME than EP patients at 80th percentile |
| <b>Long-term Outcome</b>            |                                                                                                        |                                     |                                                                                         |                                                                                                                                                                              |
| Dowsey, et al, <sup>44</sup> 2009   | International Knee Society (IKS) score measure of function 12 months after TKA                         | Pearson's chi-square test           | Independence between LEP status and having poor grade ( $\leq 120$ ) 12-month IKS score | Right TKA, LEP and poor grade IKS score were associated (58% vs. 27%; p-value < 0.001).                                                                                      |

| Source                            | Definition of Outcome                                                                                                                             | Statistical Methodology                              | Measure of Association                                                                                              | Magnitude and Direction of Associations Between LEP (vs. EP) and Outcome Measures                                                                                     |
|-----------------------------------|---------------------------------------------------------------------------------------------------------------------------------------------------|------------------------------------------------------|---------------------------------------------------------------------------------------------------------------------|-----------------------------------------------------------------------------------------------------------------------------------------------------------------------|
| <b>Readmission</b>                |                                                                                                                                                   |                                                      |                                                                                                                     |                                                                                                                                                                       |
| Inagaki et al, <sup>20</sup> 2017 | Unplanned readmission within 30-days of discharge, emergency department (ED) visit within 30 days of discharge after infrainguinal bypass surgery | Pearson's chi-square test                            | Independence between LEP status and 30-day readmissions<br><br>Independence between LEP status and 30-day ED visits | LEP and 30-day readmissions were independent (25.5% vs. 20.4%; p-value = 0.426).<br><br>LEP and 30-day ED visits were independent (23.5% vs. 27.1%; p-value = 0.600). |
| Feeney et al, <sup>64</sup> 2019  | 7-day readmission after discharge from oncologic surgery                                                                                          | Generalized linear model with Bernoulli distribution | Unadjusted OR for 7-day readmission (Spanish/EP OR NENS/EP)                                                         | LEP associated with higher readmission rates: LEP (Spanish) vs. EP, 1.35 (1.04-1.75); LEP (NENS) vs. EP, 1.50 (1.11-2.02).                                            |
| Feeney et al, <sup>23</sup> 2019  | 7-day readmission after discharge from emergency surgery admission                                                                                | Generalized linear model with Bernoulli distribution | Unadjusted OR for 7-day readmission (Spanish/EP OR NENS/EP)                                                         | LEP associated with lower readmission rates: LEP (Spanish) vs. EP, OR 0.70 (0.57-0.84), LEP (NENS) vs. EP, OR 0.78 (0.60-0.98).                                       |
| Feeney et al, <sup>24</sup> 2020  | 30-day revisit to emergency department after discharge from cancer surgery                                                                        | Pearson's chi-square test                            | Independence between LEP status and 30-day ED visits                                                                | LEP and 30-day ED visits were independent (12.0% vs. 11.0%; p-value = 0.50).                                                                                          |
| Wong et al, <sup>33</sup> 2021    | Postoperative emergency department visit within 30 days of discharge                                                                              | Pearson's chi-square test                            | Independence across LEP status, preventable 30-day ED visits, and nonpreventable 30-day ED visits                   | LEP and either preventable or nonpreventable ED visits were associated (p-value < 0.001).                                                                             |
| Manuel et al, <sup>27</sup> 2022  | 30-day readmission after total knee and hip arthroplasty                                                                                          | Pearson's chi-square test                            | Independence between LEP status and 30-day readmissions                                                             | LEP and 30-day readmissions were independent (7.9% vs. 7.2%; p-value = 0.59).                                                                                         |
| Manuel et al, <sup>28</sup> 2022  | 30-day readmission after craniotomy                                                                                                               | Bivariate logistic regression model                  | Unadjusted OR for 30-day readmission (LEP/EP)                                                                       | No difference in readmission rates: OR 1.26 (0.73-2.17).                                                                                                              |

| Source                                 | Definition of Outcome                                                                                                              | Statistical Methodology   | Measure of Association                                  | Magnitude and Direction of Associations Between LEP (vs. EP) and Outcome Measures                                                                                                                           |
|----------------------------------------|------------------------------------------------------------------------------------------------------------------------------------|---------------------------|---------------------------------------------------------|-------------------------------------------------------------------------------------------------------------------------------------------------------------------------------------------------------------|
| Stolarski et al, <sup>29</sup> 2022    | 30-day readmission, 1-year readmission, 1-year emergency department visits after laparoscopic sleeve gastrectomy or gastric bypass | Pearson's chi-square test | Independence between LEP status and 30-day readmissions | LEP and 30-day readmissions were independent (4.0% vs. 5.0%; p-value = 0.70).                                                                                                                               |
|                                        |                                                                                                                                    |                           | Independence between LEP status and 1-year readmissions | LEP and 1-year readmissions were independent (8.0% vs. 10.0%; p-value = 0.20) .                                                                                                                             |
|                                        |                                                                                                                                    |                           | Independence between LEP status and 1-year ED visits    | LEP and 1-year ED visits were associated (14.0% vs. 23.0%; p-value < 0.001) .                                                                                                                               |
| <b>Long-term Mortality or Survival</b> |                                                                                                                                    |                           |                                                         |                                                                                                                                                                                                             |
| Nashed et al, <sup>15</sup> 2012       | Overall survival from time of initial diagnostic surgery to date of death                                                          | Log rank test of equality | Difference in time-to-event between LEP & EP            | No difference between LEP and EP in overall survival (p-value = 0.40)                                                                                                                                       |
| Hyun et al, <sup>21</sup> 2017         | Death from admission to 18-month follow-up after admission for ACS event                                                           | Pearson's chi-square test | Independence between LEP status and 18-month mortality  | LEP and 19-month mortality were associated (16.3% vs. 10.1%; p-value = 0.001)                                                                                                                               |
| Sridhar et al, <sup>9</sup> 2019       | Overall survival after curative pancreatic cancer surgery                                                                          | Log rank test of equality | Difference in time-to-event between LEP & EP            | No difference between LEP and EP in median overall survival from Stage I-II cancer (p-value = 0.778); Stage III-IV cancer, longer median overall survival for LEP than EP (8 vs. 5 months; p-value = 0.039) |
| Feeney et al, <sup>24</sup> 2020       | Time to all-cause mortality from surgical oncology procedure                                                                       | Log rank test of equality | Difference in time-to-event between LEP & EP            | Longer time to death (survival) for LEP than EP (p-value = 0.00063).                                                                                                                                        |

| Source                           | Definition of Outcome                                                                                                        | Statistical Methodology   | Measure of Association                       | Magnitude and Direction of Associations Between LEP (vs. EP) and Outcome Measures |
|----------------------------------|------------------------------------------------------------------------------------------------------------------------------|---------------------------|----------------------------------------------|-----------------------------------------------------------------------------------|
| Asokan et al, <sup>10</sup> 2020 | Overall survival defined as time from esophageal cancer diagnosis to death censored to last follow-up (in operable patients) | Log rank test of equality | Difference in time-to-event between LEP & EP | No difference between LEP and EP in overall survival (p-value = 0.718)            |

Abbreviations: ACS, Acute coronary syndrome; CSICU, Cardiovascular surgical intensive care unit; CI, Confidence interval; CABG, Coronary artery bypass surgery; ED, Emergency department; EP, English Proficiency; HR, Hazard ratio; IRR, Incidence rate ratio; IKS, International Knee Society; LOS, Length of stay; LEP, Limited English proficiency; MACE, Major adverse cardiovascular events; MIGS, Minimally invasive gynecologic surgery; N/S, non-specified; NSQIP, National Surgical Quality Improvement Program; NENS, Non-English/non-Spanish; OR, Odds ratio; OME, Oral morphine equivalent; TKA, Total knee arthroplasty.



## Supplementary Figures

## eFigure 1. Articles per Year that met Inclusion Criteria

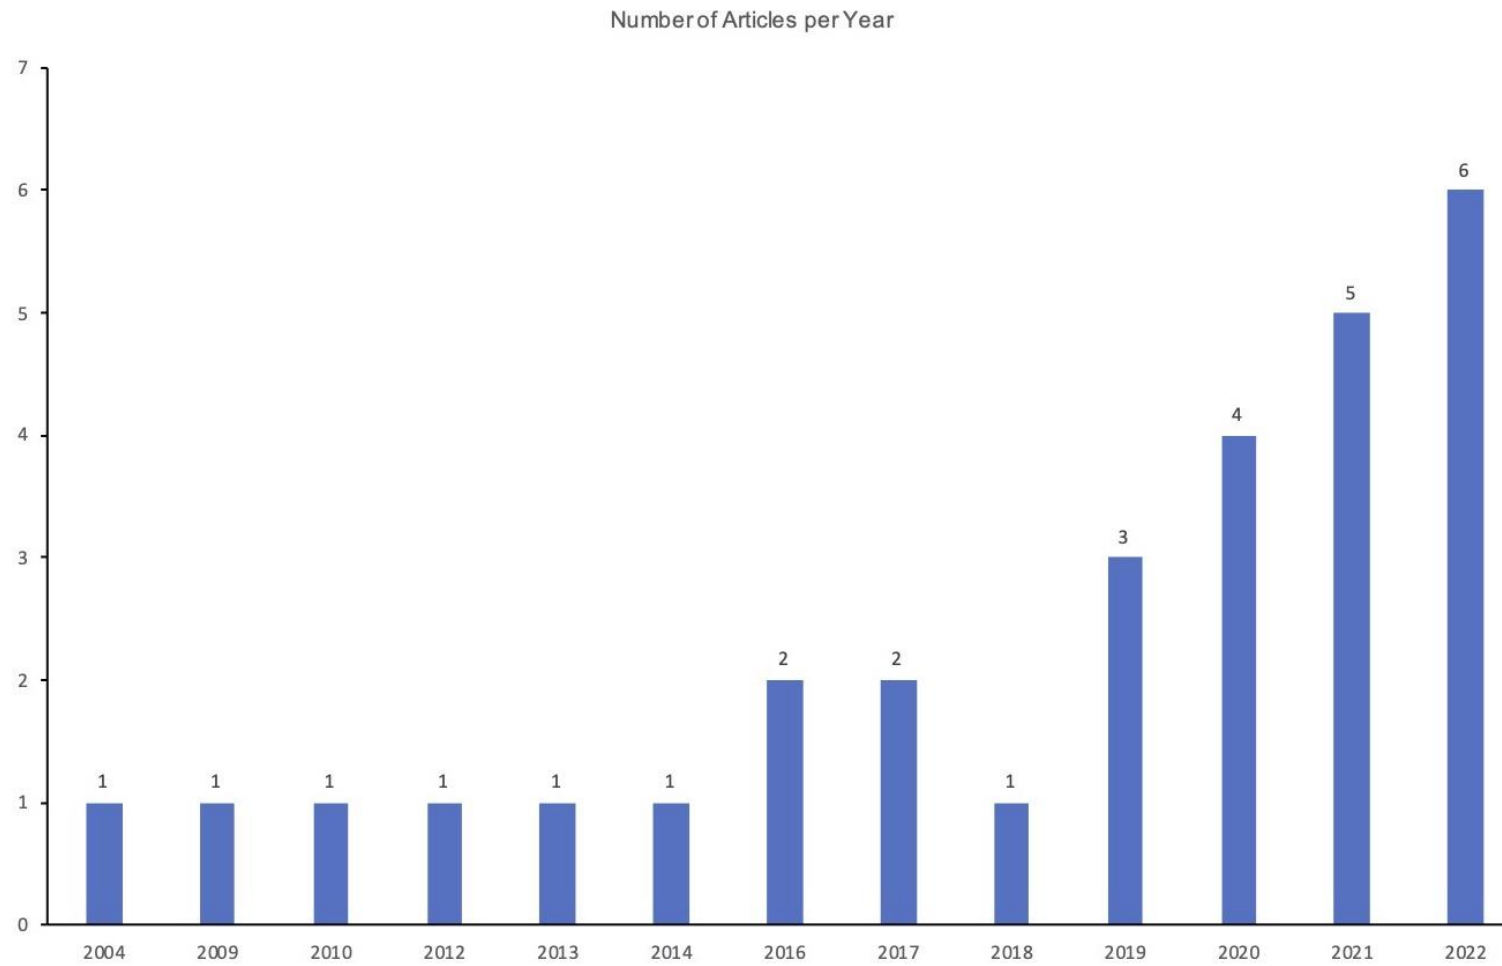

eFigure 2. Perioperative Outcomes Represented

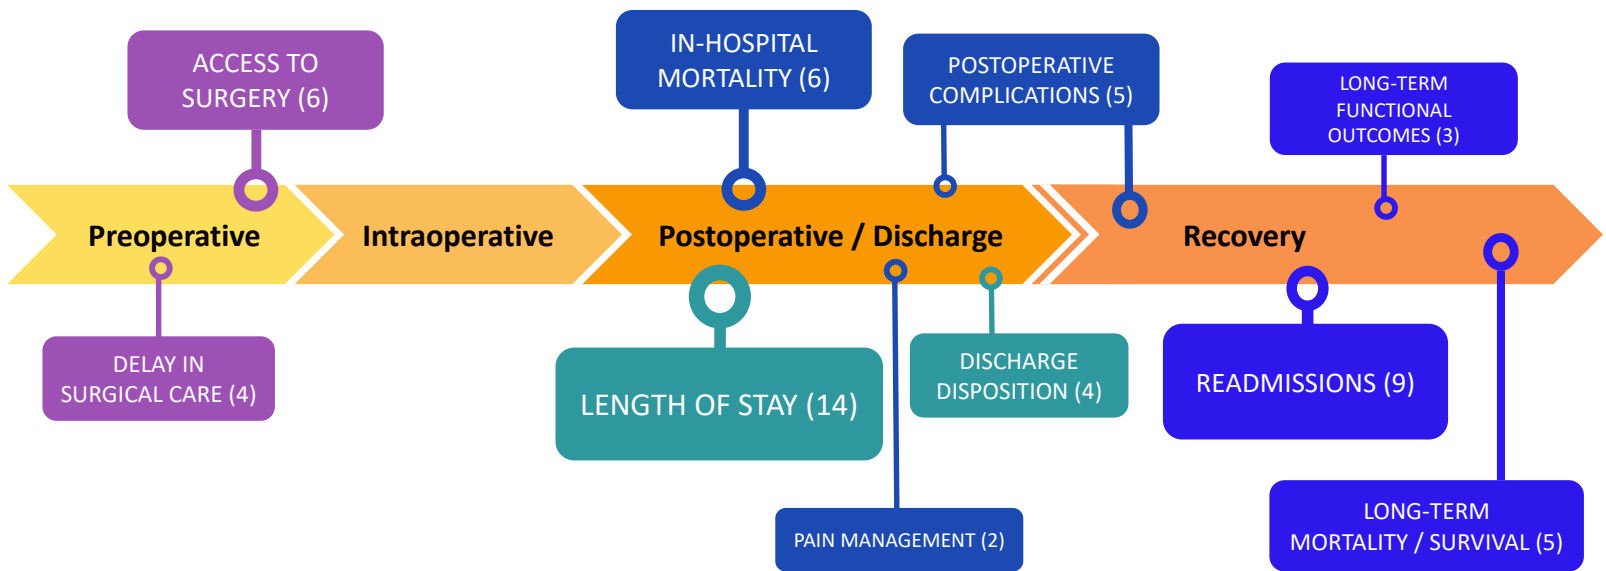

Supplement: jamanetwopen-e2322743-s001.pdf [file jamanetwopen-e2322743-s001.pdf]
