# Supplementary material for: Association of Language Barriers With Perioperative and Surgical Outcomes: A Systematic Review
Source: PubMed Central journal article supplement (PMC10336626; doi:10.1001/jamanetworkopen.2023.22743), 2023-07-11
Supplement: jamanetwopen-e2322743-s002.pdf [file jamanetwopen-e2322743-s002.pdf]

## Data Sharing Statement

Joo. Association of Language Barriers With Perioperative and Surgical Outcomes. *JAMA Netw Open*. Published July 11, 2023. doi:10.1001/jamanetworkopen.2023.22743

### Data

**Data available:** Yes

**Data types:** Data (not involving human participants)

**How to access data:** The complete study search strategy and search terms, along with the full list of articles that underwent full text review will be available in the eSupplement of this manuscript.

**When available:** With publication

### Supporting Documents

**Document types:** None

### Additional Information

**Who can access the data:** Additional data and analytic code pertaining to this study will be made available without restriction to anyone upon request.

**Types of analyses:** No restriction.

**Mechanisms of data availability:** The complete study search strategy and search terms, along with the full list of articles that underwent full text review will be available in the eSupplement of this manuscript. Any additional data and analytic code pertaining to this study will be made available without restriction to anyone upon request.
